# Supplementary material for: A comprehensive map of disease networks and molecular drug discoveries for glaucoma
Source: PubMed Central journal article supplement (PMC7298047; doi:10.1038/s41598-020-66350-w), 2020-06-16
Supplement: 41598_2020_66350_MOESM1_ESM.pdf [file 41598_2020_66350_MOESM1_ESM.pdf]

Supplementary files for

**A comprehensive map of disease networks and molecular drug  
discoveries for glaucoma**

Haixin Wang<sup>1,2,3</sup>, Yanhui Deng<sup>1</sup>, Ling Wan<sup>4</sup> and Lulin Huang<sup>1,2,3\*</sup>

<sup>1</sup>The Key Laboratory for Human Disease Gene Study of Sichuan Province and the Center of Laboratory Medicine, Sichuan Provincial People's Hospital, University of Electronic Science and Technology of China, Chengdu, Sichuan, China;

<sup>2</sup>Research Unit for Blindness Prevention of Chinese Academy of Medical Sciences (2019RU026), Sichuan Academy of Medical Sciences, Chengdu, Sichuan, China;

<sup>3</sup>Natural Products Research Center, Institute of Chengdu Biology, Sichuan Translational Medicine Hospital, Chinese Academy of Sciences, Chengdu, Sichuan, China;

<sup>4</sup>Department of Ophthalmology, Sichuan Provincial People's Hospital, School of Medicine, University of Electronic Science and Technology of China, Chengdu, China.

\*Correspondence should be addressed to:

Lulin Huang, Ph.D. Email: [huangluling@yeah.net](mailto:huangluling@yeah.net),

32 The First Ring Road West 2, Chengdu, Sichuan 610072, China,

Phone: 86-28-87393375,

Fax: 86-28-87393596.

|                                                                                                                                      |    |
|--------------------------------------------------------------------------------------------------------------------------------------|----|
| Supplementary Table 1. DAVID KEGG pathways to analyze glaucoma genes.....                                                            | 3  |
| Supplementary Table 2. From the PheWAS database, more than 1357 diseases associated with glaucoma-related genes were identified..... | 6  |
| Supplementary Table 3. From PheWAS database, more than 1356 diseases related to glaucoma by searching DE genes.....                  | 25 |
| Supplementary Table 4. In DGIbd database, 114 candidate gene-matched drugs for genetic factors.....                                  | 46 |
| Supplementary Table 5. KEGG glaucoma drug targeted 13 genes, 242 chemicals are enriched in clue database for these genes.....        | 54 |
| Supplementary Table 6. In clue database, 133 chemicals returned for glaucoma genetic factors.....                                    | 81 |
| Supplementary Table 7. KEGG glaucoma drug targeted 13 genes, 166 chemicals are enriched in clue database for these genes.....        | 77 |



**Supplementary Table 1. DAVID KEGG pathways to analyze glaucoma genes. A, Genetic factors. B, DE genes.**

| Term                                              | Count | %      | PValue   | List  | Pop  | Pop   | FDR<0.05 |
|---------------------------------------------------|-------|--------|----------|-------|------|-------|----------|
|                                                   |       |        |          | Total | Hits | Total |          |
| <b>A. Genetic factors</b>                         |       |        |          |       |      |       |          |
| hsa05200:Pathways in cancer                       | 16    | 0.0401 | 6.58E-04 | 104   | 393  | 6910  | 9.87E-03 |
| hsa04510:Focal adhesion                           | 10    | 0.0251 | 3.47E-03 | 104   | 206  | 6910  | 1.88E-02 |
| hsa05146:Amoebiasis                               | 7     | 0.0175 | 4.86E-03 | 104   | 106  | 6910  | 1.88E-02 |
| hsa04151:PI3K-Akt signaling pathway               | 13    | 0.0326 | 5.01E-03 | 104   | 345  | 6910  | 1.88E-02 |
| hsa05222:Small cell lung cancer                   | 6     | 0.015  | 8.53E-03 | 104   | 85   | 6910  | 2.08E-02 |
| hsa04512:ECM-receptor interaction                 | 6     | 0.015  | 9.39E-03 | 104   | 87   | 6910  | 2.08E-02 |
| hsa05205:Proteoglycans in cancer                  | 9     | 0.0225 | 9.71E-03 | 104   | 200  | 6910  | 2.08E-02 |
| hsa05160:Hepatitis C                              | 7     | 0.0175 | 1.42E-02 | 104   | 133  | 6910  | 2.66E-02 |
| hsa05161:Hepatitis B                              | 7     | 0.0175 | 2.08E-02 | 104   | 145  | 6910  | 3.47E-02 |
| hsa05144:Malaria                                  | 4     | 0.01   | 3.61E-02 | 104   | 49   | 6910  | 4.66E-02 |
| hsa04350:TGF-beta signaling pathway               | 5     | 0.0125 | 3.63E-02 | 104   | 84   | 6910  | 4.66E-02 |
| hsa04110:Cell cycle                               | 6     | 0.015  | 3.73E-02 | 104   | 124  | 6910  | 4.66E-02 |
| hsa04974:Protein digestion and absorption         | 5     | 0.0125 | 4.19E-02 | 104   | 88   | 6910  | 4.84E-02 |
| <b>B. DE genes</b>                                |       |        |          |       |      |       |          |
| hsa05200: Pathways in cancer                      | 84    | 0.0361 | 1.72E-10 | 727   | 393  | 6879  | 1.44E-08 |
| hsa05212: Pancreatic cancer                       | 22    | 0.0095 | 1.56E-06 | 727   | 65   | 6879  | 6.55E-05 |
| hsa04510: Focal adhesion                          | 45    | 0.0194 | 3.02E-06 | 727   | 206  | 6879  | 8.46E-05 |
| hsa03050: Proteasome                              | 17    | 0.0073 | 4.89E-06 | 727   | 44   | 6879  | 1.03E-04 |
| hsa04512: ECM-receptor interaction                | 25    | 0.0108 | 6.63E-06 | 727   | 87   | 6879  | 1.11E-04 |
| hsa05220: Chronic myeloid leukemia                | 22    | 0.0095 | 9.69E-06 | 727   | 72   | 6879  | 1.36E-04 |
| hsa05169: Epstein-Barr virus infection            | 30    | 0.0129 | 1.84E-05 | 727   | 122  | 6879  | 2.21E-04 |
| hsa05145: Toxoplasmosis                           | 27    | 0.0116 | 5.48E-05 | 727   | 110  | 6879  | 5.75E-04 |
| hsa05166: HTLV-I infection                        | 48    | 0.0206 | 7.43E-05 | 727   | 254  | 6879  | 6.93E-04 |
| hsa04722: Neurotrophin signaling pathway          | 28    | 0.0120 | 9.83E-05 | 727   | 120  | 6879  | 7.54E-04 |
| hsa04151: PIK-Akt signaling pathway               | 60    | 0.0258 | 9.88E-05 | 727   | 345  | 6879  | 7.54E-04 |
| hsa05222: Small cell lung cancer                  | 22    | 0.0095 | 1.44E-04 | 727   | 85   | 6879  | 1.01E-03 |
| hsa05202: Transcriptional misregulation in cancer | 34    | 0.0146 | 2.52E-04 | 727   | 167  | 6879  | 1.63E-03 |
| hsa05203: Viral carcinogenesis                    | 38    | 0.0163 | 7.02E-04 | 727   | 205  | 6879  | 4.21E-03 |
| hsa05146: Amoebiasis                              | 23    | 0.0099 | 0.001347 | 727   | 106  | 6879  | 7.54E-03 |
| hsa05210: Colorectal cancer                       | 16    | 0.0069 | 0.001574 | 727   | 62   | 6879  | 8.26E-03 |
| hsa04145: Phagosome                               | 29    | 0.0125 | 0.001808 | 727   | 150  | 6879  | 8.94E-03 |
| hsa04380: Osteoclast differentiation              | 26    | 0.0112 | 0.002277 | 727   | 131  | 6879  | 1.06E-02 |
| hsa05218: Melanoma                                | 17    | 0.0073 | 0.002462 | 727   | 71   | 6879  | 1.09E-02 |
| hsa04068: FoxO signaling pathway                  | 26    | 0.0112 | 0.003132 | 727   | 134  | 6879  | 1.17E-02 |
| hsa01200: Carbon metabolism                       | 23    | 0.0099 | 0.003155 | 727   | 113  | 6879  | 1.17E-02 |
| hsa04010: MAPK signaling pathway                  | 42    | 0.0181 | 0.003196 | 727   | 253  | 6879  | 1.17E-02 |
| hsa05205: Proteoglycans in cancer                 | 35    | 0.0151 | 0.003211 | 727   | 200  | 6879  | 1.17E-02 |
| hsa04974: Protein digestion and absorption        | 19    | 0.0082 | 0.004205 | 727   | 88   | 6879  | 1.47E-02 |
| hsa05168: Herpes simplex infection                | 32    | 0.0138 | 0.005041 | 727   | 183  | 6879  | 1.69E-02 |

|                                                                   |    |        |          |     |     |      |          |
|-------------------------------------------------------------------|----|--------|----------|-----|-----|------|----------|
| hsa00620: Pyruvate metabolism                                     | 11 | 0.0047 | 0.007218 | 727 | 40  | 6879 | 2.33E-02 |
| hsa04064: NF-kappa B signaling pathway                            | 18 | 0.0077 | 0.008549 | 727 | 87  | 6879 | 2.66E-02 |
| hsa05323: Rheumatoid arthritis                                    | 18 | 0.0077 | 0.009589 | 727 | 88  | 6879 | 2.78E-02 |
| hsa05215: Prostate cancer                                         | 18 | 0.0077 | 0.009589 | 727 | 88  | 6879 | 2.78E-02 |
| hsa04610: Complement and coagulation cascades                     | 15 | 0.0065 | 0.011713 | 727 | 69  | 6879 | 3.28E-02 |
| hsa01130: Biosynthesis of antibiotics                             | 34 | 0.0146 | 0.01389  | 727 | 212 | 6879 | 3.42E-02 |
| hsa04962: Vasopressin-regulated water reabsorption                | 11 | 0.0047 | 0.014372 | 727 | 44  | 6879 | 3.42E-02 |
| hsa04142: Lysosome                                                | 22 | 0.0095 | 0.014625 | 727 | 121 | 6879 | 3.42E-02 |
| hsa04932: Non-alcoholic fatty liver disease (NAFLD)               | 26 | 0.0112 | 0.014658 | 727 | 151 | 6879 | 3.42E-02 |
| hsa05321: Inflammatory bowel disease (IBD)                        | 14 | 0.0060 | 0.014711 | 727 | 64  | 6879 | 3.42E-02 |
| hsa05140: Leishmaniasis                                           | 15 | 0.0065 | 0.014976 | 727 | 71  | 6879 | 3.42E-02 |
| hsa05410: Hypertrophic cardiomyopathy (HCM)                       | 16 | 0.0069 | 0.015053 | 727 | 78  | 6879 | 3.42E-02 |
| hsa05161: Hepatitis B                                             | 25 | 0.0108 | 0.016615 | 727 | 145 | 6879 | 3.59E-02 |
| hsa05214: Glioma                                                  | 14 | 0.0060 | 0.016674 | 727 | 65  | 6879 | 3.59E-02 |
| hsa05152: Tuberculosis                                            | 29 | 0.0125 | 0.018271 | 727 | 177 | 6879 | 3.79E-02 |
| hsa05211: Renal cell carcinoma                                    | 14 | 0.0060 | 0.01883  | 727 | 66  | 6879 | 3.79E-02 |
| hsa04110: Cell cycle                                              | 22 | 0.0095 | 0.018971 | 727 | 124 | 6879 | 3.79E-02 |
| hsa04810: Regulation of actin cytoskeleton                        | 33 | 0.0142 | 0.020318 | 727 | 210 | 6879 | 3.96E-02 |
| hsa00010: Glycolysis / Gluconeogenesis                            | 14 | 0.0060 | 0.021189 | 727 | 67  | 6879 | 3.96E-02 |
| hsa05412 : Arrhythmogenic right ventricular cardiomyopathy (ARVC) | 14 | 0.0060 | 0.021189 | 727 | 67  | 6879 | 3.96E-02 |
| hsa05142: Chagas disease (American trypanosomiasis)               | 19 | 0.0082 | 0.023296 | 727 | 104 | 6879 | 4.25E-02 |
| hsa04071: Sphingolipid signaling pathway                          | 21 | 0.0090 | 0.025419 | 727 | 120 | 6879 | 4.48E-02 |
| hsa05132: Salmonella infection                                    | 16 | 0.0069 | 0.025609 | 727 | 83  | 6879 | 4.48E-02 |
| hsa04350: TGF-beta signaling pathway                              | 16 | 0.0069 | 0.028256 | 727 | 84  | 6879 | 4.73E-02 |
| hsa05414: Dilated cardiomyopathy                                  | 16 | 0.0069 | 0.028256 | 727 | 84  | 6879 | 4.73E-02 |
| hsa05010: Alzheimer's disease                                     | 27 | 0.0116 | 0.028736 | 727 | 168 | 6879 | 4.73E-02 |
| hsa05221: Acute myeloid leukemia                                  | 12 | 0.0052 | 0.029947 | 727 | 56  | 6879 | 4.79E-02 |
| hsa04668: TNF signaling pathway                                   | 19 | 0.0082 | 0.030219 | 727 | 107 | 6879 | 4.79E-02 |

Supplementary Table 2. From the PheWAS database, more than 1357 diseases associated with glaucoma-related genes were identified.

| NO | disease                                                                              | NO  | disease                                          | NO  | disease                             | NO  | disease                                                             |
|----|--------------------------------------------------------------------------------------|-----|--------------------------------------------------|-----|-------------------------------------|-----|---------------------------------------------------------------------|
| 1  | Arterial embolism and thrombosis of lower extremity artery                           | 323 | Type 1 diabetes with neurological manifestations | 645 | Cerebral aneurysm                   | 967 | Pilonidal cyst                                                      |
| 2  | Arterial embolism and thrombosis                                                     | 324 | Nonspecific findings on examination of blood     | 646 | Malunion and nonunion of fracture   | 968 | Stiffness of joint                                                  |
| 3  | Angina pectoris                                                                      | 325 | Hidradenitis                                     | 647 | Heart valve replaced                | 969 | Congenital anomalies of intestine                                   |
| 4  | Acute, but ill-defined cerebrovascular disease                                       | 326 | Congenital anomalies of skin                     | 648 | Other paralytic syndromes           | 970 | Unspecified osteomyelitis                                           |
| 5  | Atherosclerosis of native arteries of the extremities with intermittent claudication | 327 | Vaginal enterocele, congenital or acquired       | 649 | Toxic effect of venom               | 971 | Joint effusions                                                     |
| 6  | Unstable angina (intermediate coronary syndrome)                                     | 328 | Paranoid disorders                               | 650 | Spontaneous ecchymoses              | 972 | Lung involvement in conditions classified elsewhere                 |
| 7  | Polyneuropathy in diabetes                                                           | 329 | Morbid obesity                                   | 651 | severe protein-calorie malnutrition | 973 | Fracture of ribs                                                    |
| 8  | Other aneurysm                                                                       | 330 | Mastodynia                                       | 652 | Abnormal reflex                     | 974 | Abnormal findings on exam of gastrointestinal tract/ abdominal area |
| 9  | Other infectious and parasitic diseases                                              | 331 | Colorectal cancer                                | 653 | Partial epilepsy                    | 975 | Neutropenia                                                         |
| 10 | Transient cerebral ischemia                                                          | 332 | Methicillin resistant Staphylococcus aureus      | 654 | Prurigo                             | 976 | Other acute and subacute forms of ischemic heart disease            |
| 11 | Atherosclerosis of the extremities                                                   | 333 | Myeloproliferative disease                       | 655 | Osteomyelitis                       | 977 | Secondary malignancy of bone                                        |
| 12 | Peripheral vascular disease                                                          | 334 | Other disorders of bone and cartilage            | 656 | Shock                               | 978 | Loose body in joint                                                 |
| 13 | Myocardial infarction                                                                | 335 | Benign neoplasm of eye                           | 657 | Poisoning by other anti-infectives  | 979 | Other hypertensive complications                                    |
| 14 | Hemorrhoids                                                                          | 336 | Spinal stenosis of lumbar region                 | 658 | Unequal leg length (acquired)       | 980 | Fracture of patella                                                 |
| 15 | Abdominal aortic aneurysm                                                            | 337 | Obstructive sleep apnea                          | 659 | Disorders of sacrum                 | 981 | Bipolar                                                             |
| 16 | Atherosclerosis                                                                      | 338 | Dentofacial anomalies, including malocclusion    | 660 | Acute reaction to stress            | 982 | Muscular dystrophies and other myopathies                           |

|    |                                                   |     |                                                                                     |     |                                                                                              |     |                                                                                      |
|----|---------------------------------------------------|-----|-------------------------------------------------------------------------------------|-----|----------------------------------------------------------------------------------------------|-----|--------------------------------------------------------------------------------------|
| 17 | Cerebral ischemia                                 | 339 | Other and nonspecific abnormal cytological, histological and immunological findings | 661 | Cellulitis and abscess of fingers/toes                                                       | 983 | Complication of colostomy or enterostomy                                             |
| 18 | Muscle weakness                                   | 340 | Purpura and other hemorrhagic conditions                                            | 662 | Urethritis and urethral syndrome                                                             | 984 | Restless legs syndrome                                                               |
| 19 | Substance addiction and disorders                 | 341 | Dermatitis due to solar radiation                                                   | 663 | Acute tonsillitis                                                                            | 985 | Iron deficiency anemia secondary to blood loss (chronic)                             |
| 20 | Peripheral or central vertigo                     | 342 | Allergic reaction to food                                                           | 664 | Circumscribed scleroderma                                                                    | 986 | Congenital anomalies of face and neck                                                |
| 21 | Other forms of chronic heart disease              | 343 | Dermatophytosis of nail                                                             | 665 | Lymphoid leukemia, chronic                                                                   | 987 | Ventral hernia                                                                       |
| 22 | Cancer of other female genital organs             | 344 | Lack of normal physiological development                                            | 666 | Other disorders of thyroid                                                                   | 988 | Diseases of the oral soft tissues, excluding lesions specific for gingiva and tongue |
| 23 | Light-headedness and vertigo                      | 345 | Calculus of lower urinary tract                                                     | 667 | Decreased libido                                                                             | 989 | Hodgkin's disease                                                                    |
| 24 | Open-angle glaucoma                               | 346 | Other upper respiratory disease                                                     | 668 | First degree AV block                                                                        | 990 | Elevated C-reactive protein (CRP)                                                    |
| 25 | Aphasia/speech disturbance                        | 347 | Noninflammatory disorders of cervix                                                 | 669 | Urticaria                                                                                    | 991 | Abnormal results of function study of kidney                                         |
| 26 | Chronic airway obstruction                        | 348 | Chronic cystitis                                                                    | 670 | Other specified disorders of pancreatic internal secretion                                   | 992 | Alzheimer's disease                                                                  |
| 27 | Aortic aneurysm                                   | 349 | Insect bite                                                                         | 671 | Synoviopathy                                                                                 | 993 | Gastritis and duodenitis, NOS                                                        |
| 28 | Ischemic Heart Disease                            | 350 | Bacterial enteritis                                                                 | 672 | Malignant neoplasm of other and ill-defined sites within the digestive organs and peritoneum | 994 | Irregular menstrual cycle/bleeding                                                   |
| 29 | Other chronic ischemic heart disease, unspecified | 351 | Primary/intrinsic cardiomyopathies                                                  | 673 | Opiates and related narcotics causing adverse effects in therapeutic use                     | 995 | Peritonitis and retroperitoneal infections                                           |
| 30 | Aneurysm of artery of lower extremity             | 352 | pyelonephritis                                                                      | 674 | Osteitis deformans [Paget's disease of bone]                                                 | 996 | Disorders of refraction and accommodation; blindness and low vision                  |
| 31 | Cerebrovascular disease                           | 353 | Cervical radiculitis                                                                | 675 | Cancer of urinary organs (incl. kidney and                                                   | 997 | Symptoms and disorders of the joints                                                 |

|    |                                                     |     |                                                        |     |                                                            |      |                                                                              |
|----|-----------------------------------------------------|-----|--------------------------------------------------------|-----|------------------------------------------------------------|------|------------------------------------------------------------------------------|
|    |                                                     |     |                                                        |     | bladder)                                                   |      |                                                                              |
| 32 | Cardiac complications, not elsewhere classified     | 354 | Dysuria                                                | 676 | Reticulosarcoma                                            | 998  | Other chronic nonalcoholic liver disease                                     |
| 33 | Other specified diseases of hair and hair follicles | 355 | Acute appendicitis                                     | 677 | Nodular lymphoma                                           | 999  | Cardiac rhythm regulators causing adverse effects in therapeutic use         |
| 34 | stress incontinence, female                         | 356 | Other specified diseases of the salivary glands        | 678 | Methicillin sensitive Staphylococcus aureus                | 1000 | Sacroiliitis NEC                                                             |
| 35 | Acne                                                | 357 | Precordial pain                                        | 679 | Respiratory insufficiency                                  | 1001 | Fracture of ankle and foot                                                   |
| 36 | Other disorders of circulatory system               | 358 | Paroxysmal supraventricular tachycardia                | 680 | Sepsis and SIRS                                            | 1002 | Cramp of limb                                                                |
| 37 | Diseases of hair and hair follicles                 | 359 | Portal hypertension                                    | 681 | Blindness and low vision                                   | 1003 | Psoriasis                                                                    |
| 38 | Pneumonitis due to inhalation of food or vomitus    | 360 | Abnormal results of function studies                   | 682 | Polyp of female genital organs                             | 1004 | Unspecified erythematous condition                                           |
| 39 | Peripheral vascular disease, unspecified            | 361 | Other disorders of metabolism                          | 683 | Other derangement of joint                                 | 1005 | Other/Unspecified specified local infections of skin and subcutaneous tissue |
| 40 | Anal and rectal polyp                               | 362 | Other endocrine disorders                              | 684 | Secondary thrombocytopenia                                 | 1006 | Acute pancreatitis                                                           |
| 41 | Coronary atherosclerosis                            | 363 | Other specified diseases of sebaceous glands           | 685 | Chronic pancreatitis                                       | 1007 | Other disorders of male genital organs                                       |
| 42 | Other non-epithelial cancer of skin, dx or hx       | 364 | Fever of unknown origin                                | 686 | Specific nonpsychotic mental disorders due to brain damage | 1008 | Breast disorder NOS                                                          |
| 43 | Neurological disorders due to brain damage          | 365 | Adverse reaction to serum or vaccine                   | 687 | Retention of urine                                         | 1009 | Septicemia                                                                   |
| 44 | Type 1 diabetes                                     | 366 | Effects radiation NOS                                  | 688 | Abnormal tumor markers, elevated CEA or CA 125             | 1010 | Inflammation of eyelids                                                      |
| 45 | Altered mental status                               | 367 | Incisional hernia                                      | 689 | Other disorders of peritoneum                              | 1011 | Back pain                                                                    |
| 46 | Cardiac conduction disorders                        | 368 | Noninfectious disorders of lymphatic channels          | 690 | Other disorders of arteries and arterioles                 | 1012 | Pulmonary collapse; interstitial and compensatory emphysema                  |
| 47 | Other disorders of gallbladder                      | 369 | Peripheral angiopathy in diseases classified elsewhere | 691 | Suppurative and unspecified otitis media                   | 1013 | Other vitamin B12 deficiency anemia                                          |



|    |                                                                     |     |                                          |     |                                                                        |      |                                        |
|----|---------------------------------------------------------------------|-----|------------------------------------------|-----|------------------------------------------------------------------------|------|----------------------------------------|
| 48 | Late effects of cerebrovascular disease                             | 370 | Anomalies of pupillary function          | 692 | Schizoid personality disorder                                          | 1014 | Obstructive chronic bronchitis         |
| 49 | Peptic ulcer (excl. esophageal)                                     | 371 | Cervicocranial/Cervicobrachial syndrome  | 693 | Atrial flutter                                                         | 1015 | Functional disorders of bladder        |
| 50 | Other diseases of lung                                              | 372 | Cachexia                                 | 694 | Chronic pain syndrome                                                  | 1016 | Abnormal coagulation profile           |
| 51 | Osteoarthritis NOS                                                  | 373 | Erectile dysfunction [ED]                | 695 | Disorders of protein plasma/amino-acid transport and metabolism        | 1017 | Diseases of sebaceous glands           |
| 52 | Early or threatened labor; hemorrhage in early pregnancy            | 374 | Diseases of the salivary glands          | 696 | Open wound of nose and sinus                                           | 1018 | Respiratory abnormalities              |
| 53 | Bronchitis                                                          | 375 | Other dyschromia                         | 697 | Corneal edema                                                          | 1019 | Other disorders of adrenal glands      |
| 54 | Allergic rhinitis                                                   | 376 | Optic atrophy                            | 698 | Duodenal ulcer                                                         | 1020 | Curvature of spine                     |
| 55 | Complications of cardiac/vascular device, implant, and graft        | 377 | Diverticulosis and diverticulitis        | 699 | Swelling of limb                                                       | 1021 | Obstruction of bile duct               |
| 56 | Primary thrombocytopenia                                            | 378 | Neuralgia, neuritis, and radiculitis NOS | 700 | Other sprains and strains                                              | 1022 | Otitis media                           |
| 57 | Disorders of penis                                                  | 379 | Disorders of conjunctiva                 | 701 | Appendicitis                                                           | 1023 | Arthropathy associated with infections |
| 58 | Acute upper respiratory infections of multiple or unspecified sites | 380 | Hypoventilation                          | 702 | Postlaminectomy syndrome                                               | 1024 | Chronic osteomyelitis                  |
| 59 | Senile osteoporosis                                                 | 381 | Premature beats                          | 703 | Erythematous conditions                                                | 1025 | Balanoposthitis                        |
| 60 | Acid-base balance disorder                                          | 382 | Neck pain                                | 704 | Other disorders of stomach and duodenum                                | 1026 | Abnormal involuntary movements         |
| 61 | Skin cancer                                                         | 383 | Toxic multinodular goiter                | 705 | Carditis                                                               | 1027 | Fuchs' dystrophy                       |
| 62 | Ill-defined descriptions and complications of heart disease         | 384 | Hereditary hemolytic anemias             | 706 | Type 1 diabetes with renal manifestations                              | 1028 | Loss of teeth or edentulism            |
| 63 | Occlusion and stenosis of precerebral arteries                      | 385 | Fracture of hand or wrist                | 707 | Disorders of diaphragm                                                 | 1029 | Chorioretinal scars                    |
| 64 | Varicose veins of lower extremity, symptomatic                      | 386 | Coma; stupor; and brain damage           | 708 | Encounter for long-term (current) use of antiplatelets/antithrombotics | 1030 | Keratoconjunctivitis, noninfectious    |
| 65 | Hypotension NOS                                                     | 387 | Abdominal pain                           | 709 | Disorders of iron metabolism                                           | 1031 | Corns and callosities                  |
| 66 | Neoplasm of uncertain behavior of skin                              | 388 | Hemiplegia                               | 710 | Viral pneumonia                                                        | 1032 | Respiratory complications              |

|    |                                                      |     |                                                 |     |                                                        |      |                                                               |
|----|------------------------------------------------------|-----|-------------------------------------------------|-----|--------------------------------------------------------|------|---------------------------------------------------------------|
| 67 | Abnormal electrocardiogram [ECG] [EKG]               | 389 | Menopausal and postmenopausal disorders         | 711 | Myopia                                                 | 1033 | Abnormality of gait                                           |
| 68 | Hypotension                                          | 390 | Symptomatic artificial menopause                | 712 | Nonrheumatic mitral valve disorders                    | 1034 | Poisoning by psychotropic agents                              |
| 69 | Secondary malignant neoplasm                         | 391 | Spirochetal infection                           | 713 | Lyme disease                                           | 1035 | Immunity deficiency                                           |
| 70 | Abnormal function study of cardiovascular system     | 392 | Chronic ulcer of unspecified site               | 714 | Disorders resulting from impaired renal function       | 1036 | Other hypertrophic and atrophic conditions of skin            |
| 71 | Non-healing surgical wound                           | 393 | Delirium due to conditions classified elsewhere | 715 | Symptoms affecting skin                                | 1037 | Cholelithiasis                                                |
| 72 | Diplopia and disorders of binocular vision           | 394 | Vitamin B-complex deficiencies                  | 716 | Bacterial pneumonia                                    | 1038 | Eye infection, viral                                          |
| 73 | Reflux esophagitis                                   | 395 | Malignant neoplasm of liver, primary            | 717 | Dermatophytosis of the body                            | 1039 | Iron deficiency anemias, unspecified or not due to blood loss |
| 74 | Cellulitis and abscess of trunk                      | 396 | Other disorders of soft tissues                 | 718 | Giant cell arteritis                                   | 1040 | Graves' disease                                               |
| 75 | Other disorders of prostate                          | 397 | Polymyalgia Rheumatica                          | 719 | Pain in joint                                          | 1041 | Cholangitis                                                   |
| 76 | Mild cognitive impairment                            | 398 | Other retinal disorders                         | 720 | Other disorders of bladder                             | 1042 | Meningitis                                                    |
| 77 | Arrhythmia (cardiac) NOS                             | 399 | Drusen (degenerative) of retina                 | 721 | Dysthymic disorder                                     | 1043 | Visual disturbances                                           |
| 78 | Dry eyes                                             | 400 | Rheumatoid arthritis                            | 722 | Adverse effects of antibacterials (not penicillins)    | 1044 | Other benign neoplasm of connective and other soft tissue     |
| 79 | Secondary hypothyroidism                             | 401 | Other specified erythematous conditions         | 723 | Cystic kidney disease                                  | 1045 | Epiphora                                                      |
| 80 | Renal failure NOS                                    | 402 | Dyschromia and Vitiligo                         | 724 | Nasal polyps                                           | 1046 | Other hemoglobinopathies                                      |
| 81 | Malignant neoplasm of ovary and other uterine adnexa | 403 | Acute bronchitis and bronchiolitis              | 725 | Jaundice (not of newborn)                              | 1047 | Adrenal hyperfunction                                         |
| 82 | Osteoarthritis                                       | 404 | Polycystic ovaries                              | 726 | Polyarteritis nodosa and allied conditions             | 1048 | Dermatomycoses                                                |
| 83 | Disorders of lacrimal system                         | 405 | Corneal dystrophy                               | 727 | Ascites (non malignant)                                | 1049 | Paralytic ileus                                               |
| 84 | Primary open angle glaucoma                          | 406 | Other CNS infection and poliomyelitis           | 728 | Abnormal results of function study of pulmonary system | 1050 | Cancer of bronchus; lung                                      |
| 85 | Streptococcus infection                              | 407 | Hypercholesterolemia                            | 729 | Memory loss                                            | 1051 | Eosinophilia                                                  |
| 86 | Disorders of parathyroid gland                       | 408 | Retinal edema and hypertensive retinopathy      | 730 | Ptosis of eyelid                                       | 1052 | Arthropathy NOS involving multiple sites                      |

|     |                                                    |     |                                                               |     |                                                                     |      |                                                                                          |
|-----|----------------------------------------------------|-----|---------------------------------------------------------------|-----|---------------------------------------------------------------------|------|------------------------------------------------------------------------------------------|
| 87  | Acute cystitis                                     | 409 | Hypercalcemia                                                 | 731 | Peritoneal adhesions (postoperative) (postinfection)                | 1053 | Upper gastrointestinal congenital anomalies                                              |
| 88  | Chronic tonsillitis and adenoiditis                | 410 | Diseases and other conditions of the tongue                   | 732 | Certain early complications of trauma or procedure                  | 1054 | Abnormality of red blood cells                                                           |
| 89  | Malignant neoplasm of ovary                        | 411 | Endometrial hyperplasia                                       | 733 | Psychogenic and somatoform disorders                                | 1055 | Other abnormal findings on radiological examination of breast                            |
| 90  | Testicular hypofunction                            | 412 | Osteoarthritis, localized, secondary                          | 734 | Migrain with aura                                                   | 1056 | Throat pain                                                                              |
| 91  | Pseudomonas pneumonia                              | 413 | Chronic venous insufficiency [CVI]                            | 735 | Chronic laryngitis                                                  | 1057 | Pituitary hypofunction                                                                   |
| 92  | Acute and chronic tonsillitis                      | 414 | Other symptoms involving urinary system                       | 736 | Disorders of vitreous body                                          | 1058 | Irregular menstrual cycle                                                                |
| 93  | Benign neoplasm of other parts of digestive system | 415 | Gout                                                          | 737 | Mycoses                                                             | 1059 | Malignant and unknown neoplasms of brain and nervous system                              |
| 94  | Other disorders of eyelids                         | 416 | Tobacco use disorder                                          | 738 | Other acquired deformities of limbs                                 | 1060 | Arthropathy NOS                                                                          |
| 95  | Anisometropia                                      | 417 | Spondylosis without myelopathy                                | 739 | Disturbances of sensation of smell and taste                        | 1061 | Ectropion or entropion                                                                   |
| 96  | Hearing loss                                       | 418 | Obesity                                                       | 740 | Pelvic peritoneal adhesions, female (postoperative) (postinfection) | 1062 | Gastrointestinal malfunction arising from mental factors                                 |
| 97  | Secondary malignant neoplasm of digestive systems  | 419 | Pyogenic granuloma                                            | 741 | Irregular menstrual bleeding                                        | 1063 | Primary biliary cirrhosis                                                                |
| 98  | Paraproteinemia                                    | 420 | Eating disorder                                               | 742 | Adverse drug events and drug allergies                              | 1064 | Adverse effects of sedatives or other central nervous system depressants and anesthetics |
| 99  | Osteoporosis, NOS or other                         | 421 | Ovarian dysfunction                                           | 743 | Strabismus (not specified as paralytic)                             | 1065 | Malaise and fatigue                                                                      |
| 100 | Hyperlipidemia                                     | 422 | Cervical intraepithelial neoplasia [CIN] [Cervical dysplasia] | 744 | Vaginitis and vulvovaginitis                                        | 1066 | Disturbance of salivary secretion                                                        |
| 101 | Nonrheumatic tricuspid valve disorders             | 423 | Chronic kidney disease, Stage I or II                         | 745 | Torticollis                                                         | 1067 | Malignant neoplasm of renal pelvis                                                       |
| 102 | Chronic venous hypertension                        | 424 | Pathologic fracture of vertebrae                              | 746 | Chronic renal failure [CKD]                                         | 1068 | Oliguria and anuria                                                                      |
| 103 | Left bundle branch block                           | 425 | Benign neoplasm of breast                                     | 747 | Somatoform disorder                                                 | 1069 | Open wound of lip and mouth                                                              |

|     |                                           |     |                                                            |     |                                                               |      |                                                                       |
|-----|-------------------------------------------|-----|------------------------------------------------------------|-----|---------------------------------------------------------------|------|-----------------------------------------------------------------------|
| 104 | Benign neoplasm of skin                   | 426 | Contracture of joint                                       | 748 | Poisoning by anticonvulsants and anti-Parkinsonism drugs      | 1070 | Open wound of hand except finger(s)                                   |
| 105 | Poisoning by primarily systemic agents    | 427 | Other and unspecified disorders of the nervous system      | 749 | Deficiency of humoral immunity                                | 1071 | End stage renal disease                                               |
| 106 | Unspecified disorder of lipoid metabolism | 428 | Sciatica                                                   | 750 | Other disorders of eye                                        | 1072 | Premenstrual tension syndromes                                        |
| 107 | Other specified osteoporosis              | 429 | Peripheral retinal degenerations                           | 751 | Hyperhidrosis                                                 | 1073 | Disorders of the pituitary gland and its hypothalamic control         |
| 108 | Viral hepatitis                           | 430 | Cervical cancer and dysplasia                              | 752 | Atrioventricular [AV] block                                   | 1074 | Pneumoconiosis                                                        |
| 109 | Pulmonary heart disease                   | 431 | Generalized anxiety disorder                               | 753 | Diabetes or abnormal glucose tolerance complicating pregnancy | 1075 | Sialoadenitis                                                         |
| 110 | Chronic ulcer of leg or foot              | 432 | Other signs and symptoms in breast                         | 754 | Nontoxic multinodular goiter                                  | 1076 | Other disorders of synovium, tendon, and bursa                        |
| 111 | Cystitis and urethritis                   | 433 | Conjunctivitis, infectious                                 | 755 | Complication due to other implant and internal device         | 1077 | Decreased white blood cell count                                      |
| 112 | Other specified gastritis                 | 434 | Nephritis and nephropathy in diseases classified elsewhere | 756 | Other nonspecific findings on examination of urine            | 1078 | Duodenitis                                                            |
| 113 | Secondary malignant neoplasm of liver     | 435 | Secondary malignancy of lymph nodes                        | 757 | Bone cancer                                                   | 1079 | progressive myopia                                                    |
| 114 | Suicidal ideation or attempt              | 436 | Spasm of muscle                                            | 758 | Other disorders of tympanic membrane                          | 1080 | Cancer of other male genital organs                                   |
| 115 | Chronic lymphocytic thyroiditis           | 437 | Type 2 diabetes with ophthalmic manifestations             | 759 | Dental caries                                                 | 1081 | Pulmonary congestion and hypostasis                                   |
| 116 | Aneurysm of iliac artery                  | 438 | Microscopic hematuria                                      | 760 | Abnormal findings on examination of urine                     | 1082 | Other conditions of brain, NOS                                        |
| 117 | Tension headache                          | 439 | Sarcoidosis                                                | 761 | Cardiac arrest                                                | 1083 | Exostosis of jaw                                                      |
| 118 | Pathologic fracture                       | 440 | Abdominal hernia                                           | 762 | Paroxysmal ventricular tachycardia                            | 1084 | Unspecified polyarthropathy or polyarthritis involving multiple sites |
| 119 | Atherosclerosis of renal artery           | 441 | Impaired fasting glucose                                   | 763 | Keratitis, infectious                                         | 1085 | Sleep apnea                                                           |
| 120 | Other specified cardiac dysrhythmias      | 442 | Anomalies of tooth position/malocclusion                   | 764 | Liver abscess and sequelae of chronic liver disease           | 1086 | Hyperventilation                                                      |

|     |                                                                          |     |                                                                      |     |                                                                                 |      |                                                                               |
|-----|--------------------------------------------------------------------------|-----|----------------------------------------------------------------------|-----|---------------------------------------------------------------------------------|------|-------------------------------------------------------------------------------|
| 121 | Gastrointestinal hemorrhage                                              | 443 | Infection with drug-resistant microorganisms                         | 765 | Pneumonia                                                                       | 1087 | Chronic interstitial cystitis                                                 |
| 122 | Elevated sedimentation rate                                              | 444 | Abnormal chest sounds                                                | 766 | Alopecia                                                                        | 1088 | Inflammation of the eye                                                       |
| 123 | Chronic sinusitis                                                        | 445 | Diabetes type 2 with ketoacidosis or uncontrolled diabetes           | 767 | Abnormal results of function study of thyroid                                   | 1089 | Torsion dystonia                                                              |
| 124 | Cellulitis and abscess of leg, except foot                               | 446 | Pathological, developmental or recurrent dislocation                 | 768 | Dislocation                                                                     | 1090 | Congestive heart failure (CHF) NOS                                            |
| 125 | Other persistent mental disorders due to conditions classified elsewhere | 447 | Antihypertensive agents causing adverse effects                      | 769 | Other disorders of intestine                                                    | 1091 | Other symptoms/disorders or the urinary system                                |
| 126 | E. coli                                                                  | 448 | Cancer of stomach                                                    | 770 | Arthropathy associated with other disorders classified elsewhere                | 1092 | Periodontitis (acute or chronic)                                              |
| 127 | Palpitations                                                             | 449 | Hemorrhagic disorder due to intrinsic circulating anticoagulants     | 771 | Acute osteomyelitis                                                             | 1093 | Nephritis and nephropathy with pathological lesion                            |
| 128 | Essential hypertension                                                   | 450 | Disorders of function of stomach                                     | 772 | Acute posthemorrhagic anemia                                                    | 1094 | Stomatitis and mucositis (ulcerative)                                         |
| 129 | Diseases of spleen                                                       | 451 | Diseases of the larynx and vocal cords                               | 773 | Cholesteatoma                                                                   | 1095 | Simple and unspecified goiter                                                 |
| 130 | Uterine leiomyoma                                                        | 452 | Supraventricular premature beats                                     | 774 | Thyrotoxicosis with or without goiter                                           | 1096 | Fracture of pelvis                                                            |
| 131 | Fracture of vertebral column without mention of spinal cord injury       | 453 | Noninfectious dermatoses of eyelid                                   | 775 | Congenital anomalies of great vessels                                           | 1097 | Congenital anomalies of limbs                                                 |
| 132 | Hypertension                                                             | 454 | Other disorders of pancreatic internal secretion                     | 776 | Stricture of artery                                                             | 1098 | Staphylococcus infections                                                     |
| 133 | Mucous polyp of cervix                                                   | 455 | Lupus erythematosus                                                  | 777 | Dementias                                                                       | 1099 | Superficial cellulitis and abscess                                            |
| 134 | Blood in stool                                                           | 456 | Allergy/adverse effect of penicillin                                 | 778 | Pelvic inflammatory disease (PID)                                               | 1100 | Psoriatic arthropathy                                                         |
| 135 | Abnormal loss of weight and underweight                                  | 457 | Adrenal cortical steroids causing adverse effects in therapeutic use | 779 | Disorders of menstruation and other abnormal bleeding from female genital tract | 1101 | Muscular wasting and disuse atrophy                                           |
| 136 | Intestinal infection due to C. difficile                                 | 458 | Malignant neoplasm of other urinary organs                           | 780 | Hemorrhage of rectum and anus                                                   | 1102 | Postmenopausal atrophic vaginitis                                             |
| 137 | Disturbances of amino-acid transport                                     | 459 | H. pylori                                                            | 781 | Disorders of external ear                                                       | 1103 | Osteoarthritis involving more than one site, but not specified as generalized |
| 138 | Other conditions of brain                                                | 460 | Heartburn                                                            | 782 | Inflammatory and toxic neuropathy                                               | 1104 | Essential tremor                                                              |

|     |                                                       |     |                                                                                          |     |                                                                        |      |                                                                          |
|-----|-------------------------------------------------------|-----|------------------------------------------------------------------------------------------|-----|------------------------------------------------------------------------|------|--------------------------------------------------------------------------|
| 139 | Wheezing                                              | 461 | Abnormal glucose                                                                         | 783 | ASCVD                                                                  | 1105 | Pruritus and related conditions                                          |
| 140 | Chronic hepatitis                                     | 462 | Myeloid leukemia                                                                         | 784 | Congenital deficiency of other clotting factors (including factor VII) | 1106 | Congenital anomalies of urinary system                                   |
| 141 | Vascular insufficiency of intestine                   | 463 | Chondrocalcinosis                                                                        | 785 | Decubitus ulcer                                                        | 1107 | Urethral hypermobility/ISD                                               |
| 142 | Acquired absence of breast                            | 464 | Osteoarthritis, localized, primary                                                       | 786 | Antirheumatics causing adverse effects in therapeutic use              | 1108 | Rash and other nonspecific skin eruption                                 |
| 143 | Disturbances of sulphur-bearing amino-acid metabolism | 465 | Insulin pump user                                                                        | 787 | Unspecified polyarthropathy or polyarthritis                           | 1109 | Infection/inflammation of internal prosthetic device; implant; and graft |
| 144 | Perforation of tympanic membrane                      | 466 | Macular puckering of retina                                                              | 788 | Other abnormal glucose                                                 | 1110 | Disorders of adrenal glands                                              |
| 145 | Infertility, female                                   | 467 | Blood vessel replaced                                                                    | 789 | Meniere's disease                                                      | 1111 | Disorders of mineral metabolism                                          |
| 146 | Glomerulonephritis                                    | 468 | Dysmenorrhea                                                                             | 790 | Systemic lupus erythematosus                                           | 1112 | Impacted cerumen                                                         |
| 147 | Peptic ulcers                                         | 469 | Crystal arthropathies                                                                    | 791 | Breast conditions, congenital or relating to hormones                  | 1113 | Pernicious anemia                                                        |
| 148 | Multiple myeloma                                      | 470 | Spondylosis with myelopathy                                                              | 792 | Hypocalcemia                                                           | 1114 | Subarachnoid hemorrhage (injury)                                         |
| 149 | Spinal stenosis                                       | 471 | Congenital anomalies of posterior segment of eye                                         | 793 | Open wounds of head; neck; and trunk                                   | 1115 | Herpes simplex                                                           |
| 150 | Peripheral autonomic neuropathy                       | 472 | Other and unspecified disorders of back                                                  | 794 | Cellulitis and abscess of face/neck                                    | 1116 | Develoment al delays and disorders                                       |
| 151 | Transient alteration of awareness                     | 473 | Poisoning by agents primarily affecting the cardiovascular system                        | 795 | Poisoning by agents primarily affecting blood constituents             | 1117 | Prostatitis                                                              |
| 152 | Cardiac pacemaker in situ                             | 474 | Aphakia and other disorders of lens                                                      | 796 | Open wound of ear                                                      | 1118 | Major depressive disorder                                                |
| 153 | Colon cancer                                          | 475 | Cellulitis and abscess of arm/hand                                                       | 797 | Nonrheumatic aortic valve disorders                                    | 1119 | Heart transplant/surgery                                                 |
| 154 | Macular degeneration (senile) of retina NOS           | 476 | Disorders of optic nerve and visual pathways                                             | 798 | Cervicitis and endocervicitis                                          | 1120 | Respiratory failure                                                      |
| 155 | Degeneration of macula and posterior pole of retina   | 477 | Osteitis deformans and osteopathies associated with other disorders classified elsewhere | 799 | Impaction of intestine                                                 | 1121 | Adjustment reaction                                                      |
| 156 | Macular degeneration, wet                             | 478 | Hyperglyceridemia                                                                        | 800 | Hx of malignant neoplasm of oral cavity and pharynx                    | 1122 | Paroxysmal tachycardia, unspecified                                      |

|     |                                                                    |     |                                            |     |                                                    |      |                                               |
|-----|--------------------------------------------------------------------|-----|--------------------------------------------|-----|----------------------------------------------------|------|-----------------------------------------------|
| 157 | Hypothyroidism NOS                                                 | 479 | Abnormal movement                          | 801 | Psoriasis and related disorders                    | 1123 | Other disorders of cervical region            |
| 158 | Type 2 diabetes with renal manifestations                          | 480 | Pneumococcal pneumonia                     | 802 | Apnea                                              | 1124 | Chronic rheumatic disease of the heart valves |
| 159 | Disorders of lipid metabolism                                      | 481 | Orthostatic hypotension                    | 803 | Choroidal degenerations                            | 1125 | Fracture of tibia and fibula                  |
| 160 | Osteoporosis                                                       | 482 | Secondary/extrinsic cardiomyopathies       | 804 | Nerve plexus lesions                               | 1126 | Hyperosmolality and/or hypernatremia          |
| 161 | Acquired hypothyroidism                                            | 483 | Cyst or abscess of Bartholin's gland       | 805 | Hypotony of eye                                    | 1127 | Hallux valgus (Bunion)                        |
| 162 | Hypercoagulable state                                              | 484 | Gout and other crystal arthropathies       | 806 | Disorders of calcium/phosphorus metabolism         | 1128 | Fracture of humerus                           |
| 163 | Hematemesis                                                        | 485 | Abnormal serum enzyme levels               | 807 | Abnormal heart sounds                              | 1129 | Lump or mass in breast                        |
| 164 | Nephritis; nephrosis; renal sclerosis                              | 486 | Trigeminal nerve disorders [CN5]           | 808 | Acquired hemolytic anemias                         | 1130 | Esophageal bleeding (varices/hemorrhage)      |
| 165 | Cancer, suspected or other                                         | 487 | Systemic sclerosis                         | 809 | Peripheral enthesopathies and allied syndromes     | 1131 | Generalized convulsive epilepsy               |
| 166 | Sprains and strains                                                | 488 | Optic neuritis/neuropathy                  | 810 | Elevated white blood cell count                    | 1132 | Postoperative infection                       |
| 167 | Acquired deformities of finger                                     | 489 | Cancer of liver and intrahepatic bile duct | 811 | Lower gastrointestinal congenital anomalies        | 1133 | Heart valve disorders                         |
| 168 | Primary angle-closure glaucoma                                     | 490 | Disorders of muscle, ligament, and fascia  | 812 | Cysts of the jaws                                  | 1134 | Lymphadenitis                                 |
| 169 | Iatrogenic hypotension                                             | 491 | Other peripheral nerve disorders           | 813 | Asthma with exacerbation                           | 1135 | Cancer of bone and connective tissue          |
| 170 | Antineoplastic and immunosuppressive drugs causing adverse effects | 492 | Empyema and pneumothorax                   | 814 | Cancer within the respiratory system               | 1136 | Acquired foot deformities                     |
| 171 | Testicular dysfunction                                             | 493 | Pain, swelling or discharge of eye         | 815 | Actinic keratosis                                  | 1137 | Acquired spondylolisthesis                    |
| 172 | Costochondritis                                                    | 494 | Acute bronchospasm                         | 816 | Carcinoma in situ of skin                          | 1138 | Infestation (lice, mites)                     |
| 173 | Vertiginous syndromes and other disorders of vestibular system     | 495 | Cancer of bladder                          | 817 | Lipoma                                             | 1139 | Kyphosis (acquired)                           |
| 174 | GERD                                                               | 496 | Cholelithiasis with acute cholecystitis    | 818 | Osteopenia                                         | 1140 | Bullous dermatoses                            |
| 175 | Gastric ulcer                                                      | 497 | Psoriasis vulgaris                         | 819 | Osteoporosis, osteopenia and pathological fracture | 1141 | Gouty arthropathy                             |

|     |                                                            |     |                                                                                   |     |                                                        |      |                                                                                       |
|-----|------------------------------------------------------------|-----|-----------------------------------------------------------------------------------|-----|--------------------------------------------------------|------|---------------------------------------------------------------------------------------|
| 176 | Varicose veins of lower extremity                          | 498 | Allergic conjunctivitis                                                           | 820 | Rhabdomyolysis                                         | 1142 | Intracranial hemorrhage (injury)                                                      |
| 177 | Neoplasm of uncertain behavior                             | 499 | Pericarditis                                                                      | 821 | Inguinal hernia                                        | 1143 | Localized adiposity                                                                   |
| 178 | Osteoarthritis; localized                                  | 500 | Atherosclerosis of native arteries of the extremities with ulceration or gangrene | 822 | Inflammatory diseases of prostate                      | 1144 | Other specified disorders of liver                                                    |
| 179 | Symptoms involving cardiovascular system                   | 501 | Asthma                                                                            | 823 | Abnormal Papanicolaou smear of cervix and cervical HPV | 1145 | Localized superficial swelling, mass, or lump                                         |
| 180 | Diabetic retinopathy                                       | 502 | Hypermetropia                                                                     | 824 | Viral warts & HPV                                      | 1146 | Herpes zoster with nervous system complications                                       |
| 181 | Varicose veins                                             | 503 | Anomalies of jaw size/symmetry                                                    | 825 | Urinary incontinence                                   | 1147 | Retinal hemorrhage/ischemia                                                           |
| 182 | Diabetes type 1 with ketoacidosis or uncontrolled diabetes | 504 | Muscle/tendon sprain                                                              | 826 | Blister                                                | 1148 | Chronic obstructive asthma with exacerbation                                          |
| 183 | Failure to thrive                                          | 505 | Secondary hyperparathyroidism (of renal origin)                                   | 827 | Heart failure NOS                                      | 1149 | Personality disorders                                                                 |
| 184 | Symptoms involving digestive system                        | 506 | Dermatophytosis                                                                   | 828 | Benign neoplasm of bone and articular cartilage        | 1150 | Schizophrenia                                                                         |
| 185 | Cardiac congenital anomalies                               | 507 | Hemorrhage in early pregnancy                                                     | 829 | Vitamin deficiency                                     | 1151 | Insomnia                                                                              |
| 186 | Malignant neoplasm of female breast                        | 508 | Acute sinusitis                                                                   | 830 | Hepatomegaly                                           | 1152 | Bronchopneumonia and lung abscess                                                     |
| 187 | Stricture and stenosis of esophagus                        | 509 | Lack of coordination                                                              | 831 | Symptoms involving female genital tract                | 1153 | Otorrhea                                                                              |
| 188 | Other headache syndromes                                   | 510 | Iron deficiency anemias                                                           | 832 | Inflammatory disease of breast                         | 1154 | Mental retardation                                                                    |
| 189 | Intervertebral disc disorder with myelopathy               | 511 | Open wound of foot except toe(s) alone                                            | 833 | Other benign neoplasm of uterus                        | 1155 | Malignant neoplasm of uterus                                                          |
| 190 | Frequency of urination and polyuria                        | 512 | Type 1 diabetes with ophthalmic manifestations                                    | 834 | Lung disease due to external agents                    | 1156 | Hydrocele                                                                             |
| 191 | Diabetes type 2 with peripheral circulatory disorders      | 513 | Cardiac and circulatory congenital anomalies                                      | 835 | Disorders of sweat glands                              | 1157 | Edema                                                                                 |
| 192 | Benign neoplasm of ovary                                   | 514 | Other arthropathies                                                               | 836 | Other specified disorders of breast                    | 1158 | Antilipemic and antiarteriosclerotic drugs causing adverse effects in therapeutic use |



|     |                                                               |     |                                            |     |                                                                  |      |                                                                    |
|-----|---------------------------------------------------------------|-----|--------------------------------------------|-----|------------------------------------------------------------------|------|--------------------------------------------------------------------|
| 193 | Glaucoma                                                      | 515 | Viral hepatitis C                          | 837 | Absent or infrequent menstruation                                | 1159 | Conduct disorders                                                  |
| 194 | Sprains and strains of back and neck                          | 516 | Pityriasis                                 | 838 | Other symptoms referable to back                                 | 1160 | Hematuria                                                          |
| 195 | Other disorders of biliary tract                              | 517 | Cerebral edema and compression of brain    | 839 | Thyroiditis                                                      | 1161 | Cancer of mouth                                                    |
| 196 | Candidiasis                                                   | 518 | Other inflammatory spondylopathies         | 840 | Random mental disorder. Ignored for now                          | 1162 | Infection of the eye                                               |
| 197 | Breast cancer [female]                                        | 519 | Dermatophytosis / Dermatomycosis           | 841 | Posttraumatic stress disorder                                    | 1163 | Ingrowing nail                                                     |
| 198 | Breast cancer                                                 | 520 | Paralysis/spasm of vocal cords or larynx   | 842 | Thrombocytopenia                                                 | 1164 | Viral infection                                                    |
| 199 | Pain and other symptoms associated with female genital organs | 521 | Emphysema                                  | 843 | Benign neoplasm of other endocrine glands and related structures | 1165 | Electrolyte imbalance                                              |
| 200 | Circulatory disease NEC                                       | 522 | Sulfonamides                               | 844 | Symptoms involving respiratory system and other chest symptoms   | 1166 | Chronic bronchitis                                                 |
| 201 | Other unspecified back disorders                              | 523 | Pleurisy; pleural effusion                 | 845 | Hereditary and idiopathic peripheral neuropathy                  | 1167 | Abnormal weight gain                                               |
| 202 | Malignant neoplasm of rectum, rectosigmoid junction, and anus | 524 | Calcaneal spur; Exostosis NOS              | 846 | Pseudoexfoliation glaucoma                                       | 1168 | Orchitis and epididymitis                                          |
| 203 | Cystitis                                                      | 525 | Otitis media and Eustachian tube disorders | 847 | Ankylosis of joint                                               | 1169 | Chorioretinal inflammations, scars, and other disorders of choroid |
| 204 | Delirium dementia and amnesic and other cognitive disorders   | 526 | Nonallopathic lesions NEC                  | 848 | Urinary complications NEC                                        | 1170 | Antisocial/borderline personality disorder                         |
| 205 | Posterior pituitary disorders                                 | 527 | Acute pericarditis                         | 849 | Abnormal findings on mammogram or breast exam                    | 1171 | Fracture of clavicle or scapula                                    |
| 206 | Endometriosis                                                 | 528 | Disorders of phosphorus metabolism         | 850 | Arthropathy associated with neurological disorders               | 1172 | Convulsions                                                        |
| 207 | Peyronie's disease                                            | 529 | Cystoid macular degeneration of retina     | 851 | Ovarian cyst                                                     | 1173 | Cancer of brain and nervous system                                 |
| 208 | Dyshidrosis                                                   | 530 | Rotator cuff (capsule) sprain              | 852 | Open wound or laceration of eye or eyelid                        | 1174 | Hyposmolality and/or hyponatremia                                  |
| 209 | Renal failure                                                 | 531 | Senile dementia                            | 853 | Complication of nervous system device, implant, and graft        | 1175 | Noninfectious gastroenteritis                                      |

|     |                                                                     |     |                                                           |     |                                                                        |      |                                                       |
|-----|---------------------------------------------------------------------|-----|-----------------------------------------------------------|-----|------------------------------------------------------------------------|------|-------------------------------------------------------|
| 210 | Migraine                                                            | 532 | Strabismus and other disorders of binocular eye movements | 854 | Calculus of kidney                                                     | 1176 | Need for Hormone replacement therapy (postmenopausal) |
| 211 | Anemia NOS                                                          | 533 | Musculoskeletal symptoms referable to limbs               | 855 | Malignant neoplasm, other                                              | 1177 | Uterine/Uterovaginal prolapse                         |
| 212 | Cardiac pacemaker/device in situ                                    | 534 | Other abnormality of urination                            | 856 | Myasthenia gravis                                                      | 1178 | Chronic prostatitis                                   |
| 213 | Central/nonobstructive sleep apnea                                  | 535 | Pallor and flushing                                       | 857 | Alcoholism                                                             | 1179 | Hypopotassemia                                        |
| 214 | Known or suspected fetal abnormality affecting management of mother | 536 | Abnormal mammogram                                        | 858 | Complications of transplants and reattached limbs                      | 1180 | Diseases of the jaws                                  |
| 215 | Appendiceal conditions                                              | 537 | Scar conditions and fibrosis of skin                      | 859 | Althete's foot                                                         | 1181 | Seborrhea                                             |
| 216 | Bronchiectasis                                                      | 538 | Other and unspecified disc disorder                       | 860 | Elevation of levels of transaminase or lactic acid dehydrogenase [LDH] | 1182 | Cancer of brain                                       |
| 217 | Urinary obstruction                                                 | 539 | Psychogenic disorder                                      | 861 | Anemia in chronic kidney disease                                       | 1183 | Traumatic arthropathy                                 |
| 218 | Chronic pharyngitis and nasopharyngitis                             | 540 | Parasomnia                                                | 862 | Diaphragmatic hernia                                                   | 1184 | Retinal detachment with retinal defect                |
| 219 | Pancytopenia                                                        | 541 | Male infertility and abnormal spermatozoa                 | 863 | Dyspepsia and other specified disorders of function of stomach         | 1185 | Parkinson's disease                                   |
| 220 | Ventricular fibrillation and flutter                                | 542 | Cardiomyopathy                                            | 864 | Chronic obstructive asthma                                             | 1186 | Aplastic anemia                                       |
| 221 | Inflammatory bowel disease and other gastroenteritis and colitis    | 543 | Gram negative septicemia                                  | 865 | Genu valgum or varum (acquired)                                        | 1187 | Poisoning by hormones and synthetic substitutes       |
| 222 | Other and unspecified congenital anomalies                          | 544 | Seborrheic keratosis                                      | 866 | Retinoschisis and retinal cysts                                        | 1188 | Chronic ulcer of skin                                 |
| 223 | Prolapse of vaginal walls                                           | 545 | Bacteremia                                                | 867 | Extrapyramidal disease and abnormal movement disorders                 | 1189 | Herpes zoster                                         |
| 224 | Atrial fibrillation                                                 | 546 | Aseptic necrosis of bone                                  | 868 | Corneal degenerations                                                  | 1190 | Other pulmonary inflammation or edema                 |
| 225 | Conjunctivitis, noninfectious                                       | 547 | Conductive hearing loss                                   | 869 | Fracture of upper limb                                                 | 1191 | Anxiety disorder                                      |
| 226 | Sicca syndrome                                                      | 548 | Lesions of stomach and duodenum                           | 870 | Complications of gastrostomy, colostomy and enterostomy                | 1192 | Arthralgia/ankylosis of temporomandibular joint       |
| 227 | Anorexia                                                            | 549 | Functional digestive disorders                            | 871 | Dementia with cerebral degenerations                                   | 1193 | Congenital anomalies of peripheral vascular system    |

|     |                                      |     |                                                                             |     |                                                                                                                         |      |                                                             |
|-----|--------------------------------------|-----|-----------------------------------------------------------------------------|-----|-------------------------------------------------------------------------------------------------------------------------|------|-------------------------------------------------------------|
| 228 | Hyperplasia of prostate              | 550 | Attention deficit hyperactivity disorder                                    | 872 | Vascular disorders of penis                                                                                             | 1194 | Umbilical hernia                                            |
| 229 | Acute renal failure                  | 551 | Anterior pituitary disorders                                                | 873 | Enthesopathy                                                                                                            | 1195 | Hypertensive heart disease                                  |
| 230 | Displacement of intervertebral disc  | 552 | Aneurysm and dissection of heart                                            | 874 | Diseases of esophagus                                                                                                   | 1196 | Acute periodontitis                                         |
| 231 | Hydronephrosis                       | 553 | Benign neoplasm of colon                                                    | 875 | Painful respiration                                                                                                     | 1197 | Eustachian tube disorders                                   |
| 232 | Open wound of finger(s)              | 554 | Anticoagulants causing adverse effects                                      | 876 | Diseases of pancreas                                                                                                    | 1198 | Premature menopause and other ovarian failure               |
| 233 | Pancreatic cancer                    | 555 | Other acquired musculoskeletal deformity                                    | 877 | Inflammatory disease of cervix, vagina, and vulva                                                                       | 1199 | Cirrhosis of liver without mention of alcohol               |
| 234 | Atrial fibrillation and flutter      | 556 | Prolapse of vaginal vault after hysterectomy                                | 878 | Irritable Bowel Syndrome                                                                                                | 1200 | Intracranial hemorrhage                                     |
| 235 | Poisoning by antibiotics             | 557 | Other congenital musculoskeletal anomalies                                  | 879 | Urinary calculus                                                                                                        | 1201 | Poisoning by water, mineral, and uric acid metabolism drugs |
| 236 | Cardiomegaly                         | 558 | Septal Deviations/Turbinate Hypertrophy                                     | 880 | Lichen                                                                                                                  | 1202 | Chronic periodontitis                                       |
| 237 | Kidney replaced by transplant        | 559 | Other symptoms of respiratory system                                        | 881 | Idiopathic fibrosing alveolitis                                                                                         | 1203 | Ulceration of intestine                                     |
| 238 | Hemorrhage of gastrointestinal tract | 560 | Symptoms involving head and neck                                            | 882 | Other disorders of ear                                                                                                  | 1204 | Osteochondropathies                                         |
| 239 | Cancer of larynx                     | 561 | Insulins and antidiabetic agents causing adverse effects in therapeutic use | 883 | Other disorders of the kidney and ureters                                                                               | 1205 | Abnormal findings examination of lungs                      |
| 240 | Gangrene                             | 562 | Hemorrhage NOS                                                              | 884 | Tinnitus                                                                                                                | 1206 | Deep vein thrombosis [DVT]                                  |
| 241 | Disorders of other cranial nerves    | 563 | Contracture of palmar fascia                                                | 885 | Second degree AV block                                                                                                  | 1207 | Calculus of ureter                                          |
| 242 | Bladder neck obstruction             | 564 | Bursitis                                                                    | 886 | Cystic mastopathy                                                                                                       | 1208 | Endocarditis                                                |
| 243 | Gastritis and duodenitis             | 565 | Congenital pigmentary anomalies of skin                                     | 887 | Nonspecific abnormal findings on radiological and other examination of other intrathoracic organs (echocardiogram, etc) | 1209 | Disturbances in tooth eruption                              |
| 244 | Paralytic strabismus                 | 566 | Symptoms involving nervous and musculoskeletal systems                      | 888 | Contact dermatitis and other eczema due to plants [except food]                                                         | 1210 | Symptomatic menopause                                       |
| 245 | Hypertrophy of female genital organs | 567 | Urethral stricture (not specified as infectious)                            | 889 | Other diseases of the teeth and supporting structures                                                                   | 1211 | Chronic glomerulonephritis, NOS                             |

|     |                                                                   |     |                                                                                               |     |                                                                                   |      |                                                                |
|-----|-------------------------------------------------------------------|-----|-----------------------------------------------------------------------------------------------|-----|-----------------------------------------------------------------------------------|------|----------------------------------------------------------------|
| 246 | Internal derangement of knee                                      | 568 | Diabetes type 1 with peripheral circulatory disorders                                         | 890 | Congenital anomalies of the eye                                                   | 1212 | Retinal detachments and defects                                |
| 247 | Benign neoplasm of respiratory and intrathoracic organs           | 569 | Astigmatism                                                                                   | 891 | Ankylosing spondylitis                                                            | 1213 | Viral Enteritis                                                |
| 248 | Degeneration of intervertebral disc                               | 570 | Salicylates causing adverse effects in therapeutic use                                        | 892 | Subdural hemorrhage (injury)                                                      | 1214 | Polycythemia vera                                              |
| 249 | Other biliary tract disease                                       | 571 | Disorders of the autonomic nervous system                                                     | 893 | Spermatocele                                                                      | 1215 | Fracture of unspecified part of femur                          |
| 250 | Mammographic microcalcification                                   | 572 | Otosclerosis                                                                                  | 894 | Encounter for long-term (current) use of anticoagulants, antithrombotics, aspirin | 1216 | Benign neoplasm of brain and other parts of nervous system     |
| 251 | Other disorders of middle ear and mastoid                         | 573 | Alcoholic liver damage                                                                        | 895 | Glossitis                                                                         | 1217 | Claw toe (acquired)                                            |
| 252 | Uveitis, noninfectious or NOS                                     | 574 | Otitis externa                                                                                | 896 | Cerebral artery occlusion, with cerebral infarction                               | 1218 | Other diseases of respiratory system, not elsewhere classified |
| 253 | Diverticulosis                                                    | 575 | Sexually transmitted infections (not HIV or hepatitis)                                        | 897 | Mixed hyperlipidemia                                                              | 1219 | Gram positive septicemia                                       |
| 254 | Diabetes mellitus                                                 | 576 | Nonspecific abnormal findings on radiological and other examination of musculoskeletal system | 898 | Voice disturbance                                                                 | 1220 | Dyspareunia                                                    |
| 255 | Rheumatoid arthritis and other inflammatory polyarthropathies     | 577 | Pituitary hyperfunction                                                                       | 899 | Fracture of radius and ulna                                                       | 1221 | Adrenal hypofunction                                           |
| 256 | Thoracic or lumbosacral neuritis or radiculitis, unspecified      | 578 | Mitral stenosis/insufficiency                                                                 | 900 | Leukoplakia of oral mucosa                                                        | 1222 | Anal and rectal conditions                                     |
| 257 | Labyrinthitis                                                     | 579 | Syncope and collapse                                                                          | 901 | Myoneural disorders                                                               | 1223 | Dysmetabolic syndrome X                                        |
| 258 | Other congenital anomalies of lower limb, including pelvic girdle | 580 | Alkalosis                                                                                     | 902 | Phobia                                                                            | 1224 | Keratoderma, acquired                                          |
| 259 | Melanomas of skin, dx or hx                                       | 581 | Protein-calorie malnutrition                                                                  | 903 | Acute prostatitis                                                                 | 1225 | Intestinal malabsorption                                       |
| 260 | Disorders of plasma protein metabolism                            | 582 | Calculus of bile duct                                                                         | 904 | Gingival and periodontal diseases                                                 | 1226 | Miscarriage; stillbirth                                        |
| 261 | Degenerative skin conditions and other                            | 583 | Congenital cataract and lens anomalies                                                        | 905 | Hypoglycemia                                                                      | 1227 | Acquired toe deformities                                       |

|     |                                                          |     |                                                                   |     |                                               |      |                                                       |  |
|-----|----------------------------------------------------------|-----|-------------------------------------------------------------------|-----|-----------------------------------------------|------|-------------------------------------------------------|--|
|     | dermatoses                                               |     |                                                                   |     |                                               |      |                                                       |  |
| 262 | Disease of capillaries                                   | 584 | Other hereditary hemolytic anemias                                | 906 | Fasciitis                                     | 1228 | Congestive heart failure; nonhypertensive             |  |
| 263 | Keloid scar                                              | 585 | Derangement of joint, non-traumatic                               | 907 | Chronic liver disease and cirrhosis           | 1229 | Myalgia and myositis unspecified                      |  |
| 264 | Alcohol-related disorders                                | 586 | Valvular heart disease/ heart chambers                            | 908 | Other cells and casts in urine                | 1230 | Fracture of foot                                      |  |
| 265 | Occlusion of cerebral arteries, with cerebral infarction | 587 | Acute laryngitis and tracheitis                                   | 909 | Depression                                    | 1231 | Disorders of the globe                                |  |
| 266 | Nerve root and plexus disorders                          | 588 | Macular degeneration, dry                                         | 910 | Periapical abscess                            | 1232 | Myoclonus                                             |  |
| 267 | Erythemosquamous dermatosis                              | 589 | Type 2 diabetes                                                   | 911 | Obsessive-compulsive disorders                | 1233 | Non-Hodgkins lymphoma                                 |  |
| 268 | Elevated prostate specific antigen [PSA]                 | 590 | Congenital deformities of feet                                    | 912 | Stricture/obstruction of ureter               | 1234 | Corneal opacity and other disorders of cornea         |  |
| 269 | Coagulation defects                                      | 591 | Retinal vascular changes and abnormalities                        | 913 | Vascular disorders of kidney/hypertrophy      | 1235 | Complex regional/central pain syndrome                |  |
| 270 | Polycythemia vera, secondary                             | 592 | Complication of internal orthopedic device                        | 914 | Disorders of uterus, NEC                      | 1236 | Thyroid cancer                                        |  |
| 271 | Dermatomyositis and Polymyositis                         | 593 | Other venous embolism and thrombosis                              | 915 | Renal colic                                   | 1237 | Cancer of connective tissue                           |  |
| 272 | Polyp of corpus uteri                                    | 594 | Alopecia Areata                                                   | 916 | Hyperparathyroidism                           | 1238 | Anxiety, phobic and dissociative disorders            |  |
| 273 | Rosacea                                                  | 595 | Nausea and vomiting                                               | 917 | Malignant neoplasm of bladder                 | 1239 | Pervasive developmental disorders                     |  |
| 274 | Benign neoplasm of uterus                                | 596 | Nevus, non-neoplastic                                             | 918 | Benign mammary dysplasias                     | 1240 | Atopic/contact dermatitis due to other or unspecified |  |
| 275 | Rheumatic heart disease NOS                              | 597 | Bacterial infection NOS                                           | 919 | Other disorders of lipid metabolism           | 1241 | Agorophobia, social phobia, and panic disorder        |  |
| 276 | Pulmonary embolism and infarction                        | 598 | Regional enteritis                                                | 920 | Schizophrenia and other psychotic disorders   | 1242 | Acute pharyngitis                                     |  |
| 277 | Cornea replaced by transplant                            | 599 | Hypoparathyroidism                                                | 921 | Inflammatory diseases of female pelvic organs | 1243 | Open wound of toe(s)                                  |  |
| 278 | Hemorrhage or hematoma complicating a procedure          | 600 | Elevated blood pressure reading without diagnosis of hypertension | 922 | Other cerebral degenerations                  | 1244 | Other diseases of blood and blood-forming organs      |  |

|     |                                                                                                |     |                                                  |     |                                      |      |                                                           |
|-----|------------------------------------------------------------------------------------------------|-----|--------------------------------------------------|-----|--------------------------------------|------|-----------------------------------------------------------|
| 279 | Posttraumatic wound infection not elsewhere classified                                         | 601 | Cellulitis and abscess of foot, toe              | 923 | Diseases of white blood cells        | 1245 | Poisoning by analgesics, antipyretics, and antirheumatics |
| 280 | Other specified peripheral vascular diseases                                                   | 602 | Other intestinal obstruction                     | 924 | Intestinal infection                 | 1246 | Anemia in neoplastic disease                              |
| 281 | Intestinal disaccharidase deficiencies and disaccharide malabsorption                          | 603 | Constipation                                     | 925 | Hypertrophy of breast (Gynecomastia) | 1247 | Cerebral atherosclerosis                                  |
| 282 | Cardiac dysrhythmias                                                                           | 604 | Temporomandibular joint disorders                | 926 | Periostitis                          | 1248 | Disorders of coccyx                                       |
| 283 | Multiple sclerosis                                                                             | 605 | Right bundle branch block                        | 927 | Cholelithiasis and cholecystitis     | 1249 | Atherosclerosis of aorta                                  |
| 284 | Type 2 diabetes with neurological manifestations                                               | 606 | Colles' fracture                                 | 928 | Large cell lymphoma                  | 1250 | Tuberculosis                                              |
| 285 | Other specified intestinal malabsorption                                                       | 607 | Other specified diseases of nail                 | 929 | Sleep related movement disorders     | 1251 | Atrophic gastritis                                        |
| 286 | Bundle branch block                                                                            | 608 | Disease of tricuspid valve                       | 930 | Renal osteodystrophy                 | 1252 | Amblyopia                                                 |
| 287 | Cholelithiasis with other cholecystitis                                                        | 609 | Sinoatrial node dysfunction (Bradycardia)        | 931 | Other immunological findings         | 1253 | Extrinsic allergic alveolitis                             |
| 288 | Other conditions or status of the mother complicating pregnancy, childbirth, or the puerperium | 610 | Personal history of diseases of digestive system | 932 | Jaw disease NOS                      | 1254 | Lymphosarcoma                                             |
| 289 | Cardiac defibrillator in situ                                                                  | 611 | Intestinal obstruction without mention of hernia | 933 | Mood disorders                       | 1255 | Nonrheumatic pulmonary valve disorders                    |
| 290 | Vascular dementia                                                                              | 612 | Noninflammatory female genital disorders         | 934 | Fibroadenosis of breast              | 1256 | Mitral valve stenosis and/or aortic valve stenosis        |
| 291 | Spondylosis and allied disorders                                                               | 613 | Encounter for long-term (current) use of aspirin | 935 | Postmenopausal bleeding              | 1257 | Subdural hemorrhage                                       |
| 292 | Vitamin D deficiency                                                                           | 614 | Leukemia                                         | 936 | Peritoneal or intestinal adhesions   | 1258 | Contact and allergic dermatitis of eyelid                 |
| 293 | Esophageal atresia/tracheoesophageal fistula                                                   | 615 | Diseases of nail                                 | 937 | Sepsis                               | 1259 | Nontoxic nodular goiter                                   |
| 294 | Phlebitis and thrombophlebitis of lower extremities                                            | 616 | Inflammatory conditions of jaw                   | 938 | Nerve root lesions                   | 1260 | Exophthalmos                                              |
| 295 | Facial nerve disorders [CN7]                                                                   | 617 | Toxic erythema                                   | 939 | Anemia of chronic disease            | 1261 | Dysphagia                                                 |

|     |                                                                 |     |                                                             |     |                                                                 |      |                                                                     |
|-----|-----------------------------------------------------------------|-----|-------------------------------------------------------------|-----|-----------------------------------------------------------------|------|---------------------------------------------------------------------|
| 296 | Unspecified monoarthritis                                       | 618 | Other cardiac conduction disorders                          | 940 | Other local infections of skin and subcutaneous tissue          | 1262 | Glossodynia                                                         |
| 297 | Epistaxis or throat hemorrhage                                  | 619 | Diverticulum of esophagus, acquired                         | 941 | Visual field defects                                            | 1263 | Abnormal sputum                                                     |
| 298 | Cancer of prostate                                              | 620 | Other disorders of metabolic, endocrine, immunity disorders | 942 | Subarachnoid hemorrhage                                         | 1264 | Lupus                                                               |
| 299 | Occlusion of cerebral arteries                                  | 621 | Overweight, obesity and other hyperalimentation             | 943 | Subjective visual disturbances                                  | 1265 | Raynaud's syndrome                                                  |
| 300 | Proteinuria                                                     | 622 | Lymphoid leukemia                                           | 944 | Keratitis                                                       | 1266 | Oral aphthae                                                        |
| 301 | Cancer of esophagus                                             | 623 | Disorder of skin and subcutaneous tissue NOS                | 945 | Osteomyelitis, periostitis, and other infections involving bone | 1267 | Fracture of lower limb                                              |
| 302 | Secondary malignancy of brain/spine                             | 624 | Cataract                                                    | 946 | Other disorders of testis                                       | 1268 | Angiodysplasia of intestine (without mention of hemorrhage)         |
| 303 | Keratoconjunctivitis sicca                                      | 625 | Personal history of allergy to medicinal agents             | 947 | Rheumatic fever / chorea                                        | 1269 | Corneal opacity                                                     |
| 304 | Barrett's esophagus                                             | 626 | Gingivitis                                                  | 948 | Ulcer of esophagus                                              | 1270 | Gastrointestinal complications                                      |
| 305 | Postnasal drip                                                  | 627 | Esophagitis, GERD and related diseases                      | 949 | Other abnormal blood chemistry                                  | 1271 | Kyphoscoliosis and scoliosis                                        |
| 306 | Primary pulmonary hypertension                                  | 628 | Liver replaced by transplant                                | 950 | Disorders of esophageal motility                                | 1272 | Nephrotic syndrome without mention of glomerulonephritis            |
| 307 | Nephritis and nephropathy without mention of glomerulonephritis | 629 | Sensorineural hearing loss                                  | 951 | Benign neoplasm of unspecified sites                            | 1273 | Abnormal findings on study of brain and/or nervous system           |
| 308 | Celiac disease                                                  | 630 | Congenital musculoskeletal deformities of spine             | 952 | Diffuse diseases of connective tissue                           | 1274 | Hypertension complicating pregnancy, childbirth, and the puerperium |
| 309 | Other anemias                                                   | 631 | Cancer of larynx, pharynx, nasal cavities                   | 953 | Hallux rigidus                                                  | 1275 | Other diseases of respiratory system, NEC                           |
| 310 | Neoplasm of unspecified nature of digestive system              | 632 | Intracerebral hemorrhage                                    | 954 | Hypersomnia                                                     | 1276 | Other acquired deformities of ankle and foot                        |
| 311 | Cardiac arrest and ventricular fibrillation                     | 633 | Disturbance of skin sensation                               | 955 | Diseases of hard tissues of teeth                               | 1277 | Epilepsy, recurrent seizures, convulsions                           |
| 312 | Disorders of carbohydrate transport and                         | 634 | Infertility, male                                           | 956 | Atrophy of edentulous alveolar ridge                            | 1278 | Osteoarthritis, generalized                                         |

---

|     |                                                                                     |     |                                            |     |                                                                               |      |                                     |
|-----|-------------------------------------------------------------------------------------|-----|--------------------------------------------|-----|-------------------------------------------------------------------------------|------|-------------------------------------|
|     | metabolism                                                                          |     |                                            |     |                                                                               |      |                                     |
| 313 | Phlebitis and thrombophlebitis                                                      | 635 | Celiac or tropical sprue                   | 957 | Other specified nonpsychotic and/or transient mental disorders                | 1279 | Noninflammatory disorders of vagina |
| 314 | Intervertebral disc disorders                                                       | 636 | Respiratory failure; insufficiency; arrest | 958 | Noninflammatory disorders of vulva and perineum                               | 1280 | Injuries to the nervous system      |
| 315 | Cardiac shunt/ heart septal defect                                                  | 637 | Urinary tract infection                    | 959 | Redundant prepuce and phimosis/BXO                                            | 1281 | Speech and language disorder        |
| 316 | Temporomandibular joint disorder, unspecified                                       | 638 | Excessive or frequent menstruation         | 960 | Hormones and synthetic substitutes causing adverse effects in therapeutic use | 1282 | Fracture of unspecified bones       |
| 317 | Aneurysm of other specified artery                                                  | 639 | Other disorders of liver                   | 961 | Epilepsy                                                                      | 1283 | Cancer of oropharynx                |
| 318 | Swelling, mass, or lump in head and neck [Space-occupying lesion, intracranial NOS] | 640 | Allergies, other                           | 962 | Fluid overload                                                                | 1284 | Hypertensive chronic kidney disease |
| 319 | Ulcerative colitis                                                                  | 641 | Other nonmalignant breast conditions       | 963 | Hemoptysis                                                                    | 1285 | Genitourinary congenital anomalies  |
| 320 | Benign neoplasm of thyroid glands                                                   | 642 | Nervous system congenital anomalies        | 964 | Mastoiditis & related conditions                                              | 1286 | Disorders of magnesium metabolism   |
| 321 | Vascular complications of surgery and medical procedures                            | 643 | Hyperpotassemia                            | 965 | Cervical cancer                                                               | 1287 | Megaloblastic anemia                |
| 322 | Open wounds of extremities                                                          | 644 | Diseases of pulp and periapical tissues    | 966 | Postinflammatory pulmonary fibrosis                                           | 1288 | Other deficiency anemia             |
|     |                                                                                     |     |                                            |     |                                                                               | 1289 | Ulceration of the lower GI tract    |

---



Supplementary Table 3. From PheWAS database, more than 1356 diseases related to glaucoma by searching DE genes.

| NO | disease                                            | NO  | disease                                  | NO  | disease                                          | NO   | disease                                                     |
|----|----------------------------------------------------|-----|------------------------------------------|-----|--------------------------------------------------|------|-------------------------------------------------------------|
| 1  | phewas phenotype                                   | 341 | Eating disorder                          | 681 | Influenza                                        | 1021 | Known or suspected fetal abnormality                        |
| 2  | Intestinal infection                               | 342 | Random mental disorder. Ignored for now  | 682 | Acute bronchitis and bronchiolitis               | 1022 | Superficial cellulitis and abscess                          |
| 3  | Bacterial enteritis                                | 343 | Conduct disorders                        | 683 | Asthma                                           | 1023 | Cellulitis and abscess of hand/fingers                      |
| 4  | Intestinal infection due to <i>C. difficile</i>    | 344 | Pervasive developmental disorders        | 684 | Chronic obstructive asthma                       | 1024 | Cellulitis and abscess of face                              |
| 5  | Viral Enteritis                                    | 345 | Attention deficit hyperactivity disorder | 685 | Chronic obstructive asthma with exacerbation     | 1025 | Cellulitis and abscess of arm                               |
| 6  | Tuberculosis                                       | 346 | Develomental delays and disorders        | 686 | Asthma with exacerbation                         | 1026 | Cellulitis and abscess of leg                               |
| 7  | Septicemia                                         | 347 | Speech and language disorder             | 687 | Chronic airway obstruction                       | 1027 | Cellulitis and abscess of foot/toes                         |
| 8  | Gram negative septicemia                           | 348 | Mental retardation                       | 688 | Emphysema                                        | 1028 | Cellulitis and abscess of trunk                             |
| 9  | Gram positive septicemia                           | 349 | Substance addiction and disorders        | 689 | Chronic bronchitis                               | 1029 | Other local infections of skin and subcutaneous tissue      |
| 10 | Bacteremia                                         | 350 | Alcohol-related disorders                | 690 | Obstructive chronic bronchitis                   | 1030 | Carbuncle and furuncle                                      |
| 11 | Bacterial infection NOS                            | 351 | Alcoholism                               | 691 | Bronchiectasis                                   | 1031 | Impetigo                                                    |
| 12 | Staphylococcus infections                          | 352 | Alcoholic liver damage                   | 692 | Bronchitis                                       | 1032 | Pilonidal cyst                                              |
| 13 | Methicillin sensitive <i>Staphylococcus aureus</i> | 353 | Tobacco use disorder                     | 693 | Acute bronchospasm                               | 1033 | Pyogenic granuloma                                          |
| 14 | Methicillin resistant <i>Staphylococcus aureus</i> | 354 | Meningitis                               | 694 | Lung disease due to external agents              | 1034 | Unspecified local infection of skin and subcutaneous tissue |
| 15 | <i>Streptococcus</i> infection                     | 355 | CNS infection and poliomyelitis          | 695 | Extrinsic allergic alveolitis                    | 1035 | Symptoms affecting skin                                     |
| 16 | Rheumatic fever / chorea                           | 356 | Sleep disorders                          | 696 | Pneumoconiosis                                   | 1036 | Rash and other nonspecific skin eruption                    |
| 17 | <i>E. coli</i>                                     | 357 | Hypersomnia                              | 697 | Pneumonitis due to inhalation of food or vomitus | 1037 | Localized superficial swelling, mass, or lump               |
| 18 | <i>H. pylori</i>                                   | 358 | Sleep apnea                              | 698 | Postinflammatory pulmonary fibrosis              | 1038 | Disturbance of skin sensation                               |
| 19 | Drug-resistant infection                           | 359 | Central/nonobstructive sleep apnea       | 699 | Pulmonary congestion and hypostasis              | 1039 | Dermatosis NOS                                              |

|    |                                                                        |     |                                                        |     |                                                         |      |                                         |
|----|------------------------------------------------------------------------|-----|--------------------------------------------------------|-----|---------------------------------------------------------|------|-----------------------------------------|
| 20 | Herpes zoster                                                          | 360 | Obstructive sleep apnea                                | 700 | Other alveolar and parietoalveolar pneumonopathy        | 1040 | Seborheic dermatitis                    |
| 21 | Herpes zoster with nervous system complications                        | 361 | Insomnia                                               | 701 | Idiopathic fibrosing alveolitis                         | 1041 | Other congenital anomalies of skin      |
| 22 | Herpes simplex                                                         | 362 | Parasomnia                                             | 702 | Other pulmonary inflammation or edema                   | 1042 | Circumscribed scleroderma               |
| 23 | Viral hepatitis                                                        | 363 | Sleep related movement disorders                       | 703 | Empyema and pneumothorax                                | 1043 | Dyschromia and Vitiligo                 |
| 24 | Viral hepatitis C                                                      | 364 | Restless legs syndrome                                 | 704 | Pleurisy; pleural effusion                              | 1044 | Other dyschromia                        |
| 25 | Chronic hepatitis                                                      | 365 | Other cerebral degenerations                           | 705 | Pulmonary collapse; interstitial/compensatory emphysema | 1045 | Congenital pigmentary anomalies of skin |
| 26 | Viral warts & HPV                                                      | 366 | Parkinson's disease                                    | 706 | Respiratory failure; insufficiency; arrest              | 1046 | Erythematous conditions                 |
| 27 | Viral infection                                                        | 367 | Extrapyramidal disease and abnormal movement disorders | 707 | Respiratory failure                                     | 1047 | Toxic erythema                          |
| 28 | Postoperative infection                                                | 368 | Essential tremor                                       | 708 | Respiratory insufficiency                               | 1048 | Bullous dermatoses                      |
| 29 | Infection/inflammation of internal prosthetic device, implant or graft | 369 | Myoclonus                                              | 709 | Other diseases of lung                                  | 1049 | Rosacea                                 |
| 30 | Sexually transmitted infections                                        | 370 | Torsion dystonia                                       | 710 | Lung involvement in conditions classified elsewhere     | 1050 | Discoid lupus erythematosus             |
| 31 | Dermatophytosis / Dermatomycosis                                       | 371 | Degenerative disease of the spinal cord                | 711 | Wheezing and painful respiration                        | 1051 | Lupus erythematosus                     |
| 32 | Dermatophytosis                                                        | 372 | Multiple sclerosis                                     | 712 | Wheezing                                                | 1052 | Systemic lupus erythematosus            |
| 33 | Dermatophytosis of nail                                                | 373 | Disorders of the autonomic nervous system              | 713 | Painful respiration                                     | 1053 | Prurigo                                 |
| 34 | Althete's foot                                                         | 374 | Peripheral autonomic neuropathy                        | 714 | Abnormal chest sounds                                   | 1054 | Lichen                                  |
| 35 | Dermatophytosis of the body                                            | 375 | Other headache syndromes                               | 715 | Respiratory abnormalities                               | 1055 | Other specified erythematous conditions |
| 36 | Dermatomycoses                                                         | 376 | Migraine                                               | 716 | Hypoventilation                                         | 1056 | Unspecified erythematous condition      |
| 37 | Candidiasis                                                            | 377 | Migrain with aura                                      | 717 | Apnea                                                   | 1057 | Psoriasis & related disorders           |

|    |                                                     |     |                                                     |     |                                         |      |                                                    |
|----|-----------------------------------------------------|-----|-----------------------------------------------------|-----|-----------------------------------------|------|----------------------------------------------------|
| 38 | Mycoses                                             | 378 | Hemiplegia                                          | 718 | Hyperventilation                        | 1058 | Pityriasis                                         |
| 39 | Spirochetal infection                               | 379 | Other paralytic syndromes                           | 719 | Disorders of diaphragm                  | 1059 | Psoriasis                                          |
| 40 | Lyme disease                                        | 380 | Epilepsy, recurrent seizures, convulsions           | 720 | Abnormal findings examination of lungs  | 1060 | Psoriasis vulgaris                                 |
| 41 | Infestation                                         | 381 | Epilepsy                                            | 721 | Abnormal pulmonary function             | 1061 | Psoriatic arthropathy                              |
| 42 | Other infectious diseases                           | 382 | Generalized convulsive epilepsy                     | 722 | Abnormal sputum                         | 1062 | Sarcoidosis                                        |
| 43 | Cancer of mouth                                     | 383 | Partial epilepsy                                    | 723 | Hemoptysis                              | 1063 | Pruritus and related conditions                    |
| 44 | Cancer of the upper aerodigestive tract             | 384 | Convulsions                                         | 724 | Diseases of respiratory system          | 1064 | Corns and callosities                              |
| 45 | Cancer of oropharynx                                | 385 | Abnormal findings on study of brain, nervous system | 725 | Respiratory complications               | 1065 | Other hypertrophic and atrophic conditions of skin |
| 46 | Cancer of larynx                                    | 386 | Other conditions of brain                           | 726 | Other diseases of respiratory system    | 1066 | Keratoderma, acquired                              |
| 47 | Hx of malignant neoplasm of oral cavity and pharynx | 387 | Coma; stupor; and brain damage                      | 727 | Symptoms involving respiratory system   | 1067 | Keloid scar                                        |
| 48 | Esophageal cancer                                   | 388 | Cerebral edema and compression of brain             | 728 | Disorders of tooth development          | 1068 | Other dermatoses                                   |
| 49 | Stomach cancer                                      | 389 | Other conditions of brain, NOS                      | 729 | Disturbances in tooth eruption          | 1069 | Actinic keratosis                                  |
| 50 | Colorectal cancer                                   | 390 | Other disorders of the nervous system               | 730 | Diseases of hard tissues of teeth       | 1070 | Seborrheic keratosis                               |
| 51 | Colon cancer                                        | 391 | Abnormal movement                                   | 731 | Dental caries                           | 1071 | Scar conditions and fibrosis of skin               |
| 52 | Cancer of the lower GI tract                        | 392 | Abnormal involuntary movements                      | 732 | Diseases of pulp and periapical tissues | 1072 | Diseases of nail                                   |
| 53 | Hepatic cancer                                      | 393 | Abnormality of gait                                 | 733 | Periapical abscess                      | 1073 | Ingrowing nail                                     |
| 54 | Hepatic cancer, primary                             | 394 | Lack of coordination                                | 734 | Gingival and periodontal diseases       | 1074 | Other specified diseases of nail                   |
| 55 | Pancreatic cancer                                   | 395 | Abnormal reflex                                     | 735 | Gingivitis                              | 1075 | Diseases of hair and hair follicles                |
| 56 | Neoplasm of unspecified nature of digestive system  | 396 | Disturbances of sensation of smell and taste        | 736 | Periodontitis (acute or chronic)        | 1076 | Alopecia                                           |
| 57 | Cancer of the digestive organs and                  | 397 | Other peripheral nerve disorders                    | 737 | Acute periodontitis                     | 1077 | Alopecia Areata                                    |

|    |                                                         |     |                                                 |     |                                                       |      |                                                     |
|----|---------------------------------------------------------|-----|-------------------------------------------------|-----|-------------------------------------------------------|------|-----------------------------------------------------|
|    | peritoneum                                              |     |                                                 |     |                                                       |      |                                                     |
| 58 | Cancer within the respiratory system                    | 398 | Disorders of other cranial nerves               | 738 | Chronic periodontitis                                 | 1078 | Hirsutism                                           |
| 59 | Lung cancer                                             | 399 | Trigeminal nerve disorders                      | 739 | Dentofacial anomalies, including malocclusion         | 1079 | Other specified diseases of hair and hair follicles |
| 60 | Cancer of bone & connective tissue                      | 400 | Facial nerve disorders                          | 740 | Anomalies of tooth position/malocclusion              | 1080 | Disorders of sweat glands                           |
| 61 | Bone cancer                                             | 401 | Nerve root and plexus disorders                 | 741 | Other diseases of the teeth and supporting structures | 1081 | Dyshidrosis                                         |
| 62 | Cancer of connective tissue                             | 402 | Nerve plexus lesions                            | 742 | Loss of teeth or edentulism                           | 1082 | Hidradenitis                                        |
| 63 | Skin cancer                                             | 403 | Nerve root lesions                              | 743 | Atrophy of edentulous alveolar ridge                  | 1083 | Generalized hyperhidrosis                           |
| 64 | Melanoma                                                | 404 | Complex regional/central pain syndrome          | 744 | Diseases of the jaws                                  | 1084 | Diseases of sebaceous glands                        |
| 65 | Non-melanoma skin cancer                                | 405 | Chronic pain syndrome                           | 745 | Cysts of the jaws                                     | 1085 | Acne                                                |
| 66 | Carcinoma in situ of skin                               | 406 | Hereditary and idiopathic peripheral neuropathy | 746 | Anomalies of jaw size/symmetry                        | 1086 | Sebaceous cyst                                      |
| 67 | Skin neoplasm of uncertain behavior                     | 407 | Inflammatory and toxic neuropathy               | 747 | Temporomandibular joint disorders                     | 1087 | Seborrhea                                           |
| 68 | Breast cancer                                           | 408 | Myoneural disorders                             | 748 | Temporomandibular joint disorder NOS                  | 1088 | Other specified diseases of sebaceous glands        |
| 69 | Breast cancer, including in situ                        | 409 | Myasthenia gravis                               | 749 | Arthralgia/ankylosis of temporomandibular joint       | 1089 | Chronic ulcer of skin                               |
| 70 | Breast cancer                                           | 410 | Muscular dystrophies and other myopathies       | 750 | Inflammatory conditions of jaw                        | 1090 | Decubitus ulcer                                     |
| 71 | Acquired absence of breast                              | 411 | Disorders of the globe                          | 751 | Exostosis of jaw                                      | 1091 | Chronic ulcer of leg or foot                        |
| 72 | Cervical cancer and dysplasia                           | 412 | progressive myopia                              | 752 | Jaw disease NOS                                       | 1092 | Chronic ulcer of unspecified site                   |
| 73 | Cervical cancer                                         | 413 | Hypotony of eye                                 | 753 | Diseases of the salivary glands                       | 1093 | Diffuse diseases of connective tissue               |
| 74 | Cervical intraepithelial neoplasia (Cervical dysplasia) | 414 | Retinal detachments and defects                 | 754 | Sialoadenitis                                         | 1094 | Sicca syndrome                                      |
| 75 | Uterine cancer                                          | 415 | Retinal detachment with retinal defect          | 755 | Disturbance of salivary secretion                     | 1095 | Systemic sclerosis                                  |

|    |                                                       |     |                                            |     |                                                 |      |                                                                  |
|----|-------------------------------------------------------|-----|--------------------------------------------|-----|-------------------------------------------------|------|------------------------------------------------------------------|
| 76 | Cancer of other female genital organs                 | 416 | Retinoschisis and retinal cysts            | 756 | Other specified diseases of the salivary glands | 1096 | Dermatomyositis and Polymyositis                                 |
| 77 | Ovarian cancer                                        | 417 | Retinal disorders                          | 757 | Diseases of the oral soft tissues               | 1097 | Infections involving bone                                        |
| 78 | Malignant neoplasm of ovary                           | 418 | Macular degeneration                       | 758 | Stomatitis and mucositis                        | 1098 | Osteomyelitis                                                    |
| 79 | Cancer of other female genital organs                 | 419 | Macular degeneration, dry                  | 759 | Ulcerative stomatitis & mucositis               | 1099 | Acute osteomyelitis                                              |
| 80 | Prostate cancer                                       | 420 | Macular degeneration, wet                  | 760 | Oral aphthae                                    | 1100 | Chronic osteomyelitis                                            |
| 81 | Cancer of other male genital organs                   | 421 | Cystoid macular degeneration of retina     | 761 | Diseases of lips                                | 1101 | Unspecified osteomyelitis                                        |
| 82 | Cancer of kidney and urinary organs                   | 422 | Macular puckering of retina                | 762 | Leukoplakia of oral mucosa                      | 1102 | Periostitis                                                      |
| 83 | Cancer of kidney and renal pelvis                     | 423 | Retinal drusen                             | 763 | Diseases of the tongue                          | 1103 | Arthropathy associated with infections                           |
| 84 | Renal cell carcinoma                                  | 424 | Age-related macular degeneration           | 764 | Glossitis                                       | 1104 | Pyogenic arthritis                                               |
| 85 | Malignant neoplasm of renal pelvis                    | 425 | Retinal vascular changes and abnormalities | 765 | Glossodynia                                     | 1105 | Arthropathy associated with other disorders classified elsewhere |
| 86 | Bladder cancer and neoplasms                          | 426 | Peripheral retinal degenerations           | 766 | Diseases of esophagus                           | 1106 | Arthropathy associated with neurological disorders               |
| 87 | Bladder cancer                                        | 427 | Retinal hemorrhage/ischemia                | 767 | Esophagitis, GERD and related diseases          | 1107 | Rheumatoid arthritis & related inflammatory polyarthropathies    |
| 88 | Malignant neoplasm of kidney and other urinary organs | 428 | Retinal edema and hypertensive retinopathy | 768 | GERD                                            | 1108 | Rheumatoid arthritis                                             |
| 89 | Malignant neoplasm of brain and nervous system        | 429 | Disorders of choroid                       | 769 | Ulcer of esophagus                              | 1109 | Inflammatory spondylopathies                                     |
| 90 | Cancer of brain and nervous system                    | 430 | Chorioretinal scars                        | 770 | Barrett's esophagus                             | 1110 | Sacroiliitis NEC                                                 |
| 91 | Brain cancer                                          | 431 | Choroidal degenerations                    | 771 | Reflux esophagitis                              | 1111 | Ankylosing spondylitis                                           |
| 92 | Thyroid cancer                                        | 432 | Disorders of cornea                        | 772 | Esophageal bleeding                             | 1112 | Other arthropathies                                              |
| 93 | Cancer, suspected or other                            | 433 | Corneal opacity                            | 773 | Stricture and stenosis of esophagus             | 1113 | Unspecified polyarthropathy or polyarthritis                     |
| 94 | Malignant neoplasm, other                             | 434 | Corneal edema                              | 774 | Disorders of esophageal motility                | 1114 | Polyarthropathy or polyarthritis involving multiple sites NOS    |

|     |                                                   |     |                                           |     |                                                         |      |                                              |
|-----|---------------------------------------------------|-----|-------------------------------------------|-----|---------------------------------------------------------|------|----------------------------------------------|
| 95  | Secondary malignant neoplasm                      | 435 | Corneal degenerations                     | 775 | Diverticulum of esophagus, acquired                     | 1115 | Unspecified monoarthritis                    |
| 96  | Secondary malignancy of lymph nodes               | 436 | Corneal dystrophy                         | 776 | Peptic ulcer                                            | 1116 | Arthropathy NOS                              |
| 97  | Secondary malignancy of lung                      | 437 | Fuchs' dystrophy                          | 777 | Hemorrhage from gastrointestinal ulcer                  | 1117 | Arthropathy NOS involving multiple sites     |
| 98  | Secondary malignant neoplasm of digestive systems | 438 | Cornea replaced by transplant             | 778 | Gastric ulcer                                           | 1118 | Polymyalgia Rheumatica                       |
| 99  | Secondary malignant neoplasm of liver             | 439 | Glaucoma                                  | 779 | Duodenal ulcer                                          | 1119 | Spinal stenosis                              |
| 100 | Secondary malignancy of brain/spine               | 440 | Open-angle glaucoma                       | 780 | Peptic ulcers                                           | 1120 | Spinal stenosis of lumbar region             |
| 101 | Secondary malignancy of bone                      | 441 | Primary open angle glaucoma               | 781 | Dysphagia                                               | 1121 | Spondylosis and allied disorders             |
| 102 | Neoplasm of uncertain behavior                    | 442 | Primary angle-closure glaucoma            | 782 | Heartburn                                               | 1122 | Spondylosis without myelopathy               |
| 103 | Myeloproliferative disease                        | 443 | Pseudoexfoliation glaucoma                | 783 | Gastritis and duodenitis                                | 1123 | Spondylosis with myelopathy                  |
| 104 | Polycythemia vera                                 | 444 | Cataract                                  | 784 | Atrophic gastritis                                      | 1124 | Intervertebral disc disorders                |
| 105 | Hodgkin's disease                                 | 445 | Nonsenile Cataract                        | 785 | Duodenitis                                              | 1125 | Displacement of intervertebral disc          |
| 106 | Cancer of other lymphoid, histiocytic tissue      | 446 | Disorders of refraction and accommodation | 786 | Other specified gastritis                               | 1126 | Degeneration of intervertebral disc          |
| 107 | Non-Hodgkins lymphoma                             | 447 | Myopia                                    | 787 | Gastritis and duodenitis, NOS                           | 1127 | Intervertebral disc disorder with myelopathy |
| 108 | Nodular lymphoma                                  | 448 | Astigmatism                               | 788 | Disorders of function of stomach                        | 1128 | Postlaminectomy syndrome                     |
| 109 | Reticulosarcoma                                   | 449 | Hypermetropia                             | 789 | Gastroparesis                                           | 1129 | Other and unspecified disc disorder          |
| 110 | Lymphosarcoma                                     | 450 | Blindness and low vision                  | 790 | Complications of gastrostomy, colostomy and enterostomy | 1130 | Disorders of cervical region                 |
| 111 | Large cell lymphoma                               | 451 | Visual disturbances                       | 791 | Dyspepsia and disorders of function of stomach          | 1131 | Torticollis                                  |
| 112 | Leukemia                                          | 452 | Amblyopia                                 | 792 | Other disorders of stomach and duodenum                 | 1132 | Other disorders of back                      |

|     |                                                            |     |                                            |     |                                  |      |                                                                     |
|-----|------------------------------------------------------------|-----|--------------------------------------------|-----|----------------------------------|------|---------------------------------------------------------------------|
| 113 | Lymphoid leukemia                                          | 453 | Diplopia and disorders of binocular vision | 793 | Lesions of stomach and duodenum  | 1133 | Disorders of sacrum                                                 |
| 114 | Chronic lymphoid leukemia                                  | 454 | Anisometropia                              | 794 | Appendiceal conditions           | 1134 | Disorders of coccyx                                                 |
| 115 | Myeloid leukemia                                           | 455 | Visual field defects                       | 795 | Appendicitis                     | 1135 | Other symptoms referable to back                                    |
| 116 | Multiple myeloma                                           | 456 | Subjective visual disturbances             | 796 | Acute appendicitis               | 1136 | Other unspecified back disorders                                    |
| 117 | Benign neoplasm of colon                                   | 457 | Infection of the eye                       | 797 | Abdominal hernia                 | 1137 | Peripheral enthesopathies                                           |
| 118 | Benign neoplasm of lip, oral cavity, and pharynx           | 458 | Eye infection, viral                       | 798 | Inguinal hernia                  | 1138 | Enthesopathy                                                        |
| 119 | Benign neoplasm of other parts of digestive system         | 459 | Conjunctivitis, infectious                 | 799 | Diaphragmatic hernia             | 1139 | Synoviopathy                                                        |
| 120 | Benign neoplasm of respiratory and intrathoracic organs    | 460 | Keratitis, infectious                      | 800 | Femoral hernia                   | 1140 | Bursitis                                                            |
| 121 | Benign neoplasm of bone and articular cartilage            | 461 | Keratitis                                  | 801 | Umbilical hernia                 | 1141 | Calcaneal spur; Exostosis NOS                                       |
| 122 | Lipoma                                                     | 462 | Inflammation of the eye                    | 802 | Ventral hernia                   | 1142 | Disorders of synovium, tendon, and bursa                            |
| 123 | Other benign neoplasm of connective and other soft tissue  | 463 | Uveitis                                    | 803 | Incisional hernia                | 1143 | Disorders of muscle, ligament, and fascia                           |
| 124 | Benign neoplasm of skin                                    | 464 | Conjunctivitis, noninfectious              | 804 | Inflammatory bowel disease       | 1144 | Fasciitis                                                           |
| 125 | Benign neoplasm of uterus                                  | 465 | Allergic conjunctivitis                    | 805 | Crohn's disease                  | 1145 | Dupuytren's disease                                                 |
| 126 | Uterine leiomyoma                                          | 466 | Inflammation of eyelids                    | 806 | Ulcerative colitis               | 1146 | Other disorders of soft tissues                                     |
| 127 | Benign neoplasm of uterus                                  | 467 | Noninfectious dermatoses of eyelid         | 807 | Ulceration of the lower GI tract | 1147 | Osteitis deformans and osteopathies associated with other disorders |
| 128 | Benign neoplasm of ovary                                   | 468 | Keratoconjunctivitis, noninfectious        | 808 | Ulceration of intestine          | 1148 | Paget's disease of bone                                             |
| 129 | Benign neoplasm of eye                                     | 469 | Keratoconjunctivitis sicca                 | 809 | Angiodysplasia of intestine      | 1149 | Osteochondropathies                                                 |
| 130 | Benign neoplasm of brain and other parts of nervous system | 470 | Disorders of conjunctiva                   | 810 | Intestinal malabsorption         | 1150 | Other disorders of bone and cartilage                               |
| 131 | Benign neoplasm of thyroid glands                          | 471 | Other disorders of eyelids                 | 811 | Celiac or tropical sprue         | 1151 | Aseptic necrosis of bone                                            |

|     |                                           |     |                                              |     |                                                                    |      |                                          |
|-----|-------------------------------------------|-----|----------------------------------------------|-----|--------------------------------------------------------------------|------|------------------------------------------|
| 132 | Benign neoplasm of other endocrine glands | 472 | Ectropion or entropion                       | 812 | Celiac disease                                                     | 1152 | Costochondritis                          |
| 133 | Hemangioma and lymphangioma, any site     | 473 | Ptosis of eyelid                             | 813 | Other specified intestinal malabsorption                           | 1153 | Malunion fracture                        |
| 134 | Benign neoplasm of unspecified sites      | 474 | Disorders of lacrimal system                 | 814 | Intestinal malabsorption NOS                                       | 1154 | Acquired foot deformities                |
| 135 | Simple goiter                             | 475 | Dry eyes                                     | 815 | Noninfectious gastroenteritis                                      | 1155 | Flat foot                                |
| 136 | Nontoxic nodular goiter                   | 476 | Epiphora                                     | 816 | Ileostomy status                                                   | 1156 | Acquired toe deformities                 |
| 137 | Nontoxic uninodular goiter                | 477 | Disorders of optic nerve and visual pathways | 817 | Intestinal obstruction without mention of hernia                   | 1157 | Hammer toe                               |
| 138 | Nontoxic multinodular goiter              | 478 | Optic atrophy                                | 818 | Paralytic ileus                                                    | 1158 | Claw toe                                 |
| 139 | Thyrotoxicosis                            | 479 | Optic neuritis/neuropathy                    | 819 | Impaction of intestine                                             | 1159 | Hallux rigidus                           |
| 140 | Graves' disease                           | 480 | Disorders of binocular eye movements         | 820 | Peritoneal or intestinal adhesions                                 | 1160 | Hallux valgus (Bunion)                   |
| 141 | Toxic multinodular goiter                 | 481 | Strabismus (not specified as paralytic)      | 821 | Other intestinal obstruction                                       | 1161 | Acquired deformities of ankle and foot   |
| 142 | Exophthalmos                              | 482 | Paralytic strabismus                         | 822 | Symptoms involving digestive system                                | 1162 | Acquired deformities of limbs            |
| 143 | Hypothyroidism                            | 483 | Other disorders of eye                       | 823 | Diverticulosis and diverticulitis                                  | 1163 | Acquired deformities of finger           |
| 144 | Iatrogenic hypothyroidism                 | 484 | Scleritis and episcleritis                   | 824 | Diverticulosis                                                     | 1164 | Genu valgum or varum (acquired)          |
| 145 | Acquired hypothyroidism                   | 485 | Disorders of vitreous body                   | 825 | Diverticulitis                                                     | 1165 | Unequal leg length (acquired)            |
| 146 | Thyroiditis                               | 486 | Aphakia and other disorders of lens          | 826 | Constipation                                                       | 1166 | Curvature of spine                       |
| 147 | Chronic lymphocytic thyroiditis           | 487 | Anomalies of pupillary function              | 827 | Functional digestive disorders                                     | 1167 | Kyphosis (acquired)                      |
| 148 | Other disorders of thyroid                | 488 | Pain, swelling or discharge of eye           | 828 | Irritable Bowel Syndrome                                           | 1168 | Scoliosis                                |
| 149 | Abnormal thyroid function                 | 489 | Disorders of external ear                    | 829 | Abnormal findings on exam of gastrointestinal tract/abdominal area | 1169 | Other acquired musculoskeletal deformity |
| 150 | Diabetes mellitus                         | 490 | Otitis externa                               | 830 | History of diseases of digestive system                            | 1170 | Acquired spondylolisthesis               |
| 151 | Type 1 diabetes                           | 491 | Impacted cerumen                             | 831 | Anal and rectal conditions                                         | 1171 | Contracture of joint                     |



|     |                                                  |     |                                                                |     |                                                      |      |                                                      |
|-----|--------------------------------------------------|-----|----------------------------------------------------------------|-----|------------------------------------------------------|------|------------------------------------------------------|
| 152 | Type 1 diabetic ketoacidosis                     | 492 | Eustachian tube disorders                                      | 832 | Anal and rectal polyp                                | 1172 | Osteoarthritis                                       |
| 153 | Type 1 diabetes nephropathy                      | 493 | Otitis media                                                   | 833 | Peritonitis and retroperitoneal infections           | 1173 | Osteoarthritis; localized                            |
| 154 | Type 1 diabetic retinopathy                      | 494 | Suppurative and unspecified otitis media                       | 834 | Other disorders of peritoneum                        | 1174 | Osteoarthritis; localized, primary                   |
| 155 | Type 1 diabetic neuropathy                       | 495 | Eustachian tube disorders                                      | 835 | Peritoneal adhesions (postoperative) (postinfection) | 1175 | Osteoarthritis; localized, secondary                 |
| 156 | Type 1 diabetic peripheral circulatory disorders | 496 | Mastoiditis                                                    | 836 | Other disorders of intestine                         | 1176 | Osteoarthritis, generalized                          |
| 157 | Type 2 diabetes                                  | 497 | Otorrhea                                                       | 837 | Gastrointestinal complications                       | 1177 | Osteoarthritis of multiple sites                     |
| 158 | Type 2 diabetic ketoacidosis                     | 498 | Otalgia                                                        | 838 | Chronic liver disease and cirrhosis                  | 1178 | Osteoarthritis NOS                                   |
| 159 | Type 2 diabetic nephropathy                      | 499 | Otosclerosis                                                   | 839 | Chronic nonalcoholic liver disease                   | 1179 | Symptoms and disorders of the joints                 |
| 160 | Type 2 diabetic retinopathy                      | 500 | Other disorders of tympanic membrane                           | 840 | Cirrhosis of liver without mention of alcohol        | 1180 | Ankylosis of joint                                   |
| 161 | Type 2 diabetic neuropathy                       | 501 | Perforation of tympanic membrane                               | 841 | Biliary cirrhosis                                    | 1181 | Stiffness of joint                                   |
| 162 | Type 2 diabetic peripheral circulatory disorders | 502 | Other disorders of middle ear and mastoid                      | 842 | Liver abscess and sequelae of chronic liver disease  | 1182 | Joint effusions                                      |
| 163 | Insulin pump user                                | 503 | Cholesteatoma                                                  | 843 | Portal hypertension                                  | 1183 | Derangement of joint, non-traumatic                  |
| 164 | Abnormal glucose                                 | 504 | Vertiginous syndromes and other disorders of vestibular system | 844 | Ascites (non malignant)                              | 1184 | Loose body in joint                                  |
| 165 | Impaired fasting glucose                         | 505 | Meniere's disease                                              | 845 | Disorders of liver                                   | 1185 | Pathological, developmental or recurrent dislocation |
| 166 | Other abnormal glucose                           | 506 | Peripheral or central vertigo                                  | 846 | Liver replaced by transplant                         | 1186 | Other derangement of joint                           |
| 167 | Glycosuria or Acetonuria                         | 507 | Labyrinthitis                                                  | 847 | Hepatomegaly                                         | 1187 | Osteoporosis, osteopenia, & pathological fractures   |
| 168 | Polyneuropathy in diabetes                       | 508 | Light-headedness and vertigo                                   | 848 | Jaundice                                             | 1188 | Osteoporosis, NOS or other                           |
| 169 | Diabetic retinopathy                             | 509 | Other disorders of ear                                         | 849 | Abnormal results of function study of liver          | 1189 | Osteoporosis                                         |

|     |                                                               |     |                                                    |     |                                                              |      |                                                    |
|-----|---------------------------------------------------------------|-----|----------------------------------------------------|-----|--------------------------------------------------------------|------|----------------------------------------------------|
| 170 | Other disorders of pancreatic internal secretion              | 510 | Hearing loss                                       | 850 | Other specified disorders of liver                           | 1190 | Behcet's syndrome                                  |
| 171 | Hypoglycemia                                                  | 511 | Sensorineural hearing loss                         | 851 | Abnormal serum enzyme levels                                 | 1191 | Other specified osteoporosis                       |
| 172 | Other specified disorders of pancreatic internal secretion    | 512 | Conductive hearing loss                            | 852 | Elevated levels of transaminase or lactic acid dehydrogenase | 1192 | Pathologic fracture                                |
| 173 | Disorders of parathyroid gland                                | 513 | Tinnitus                                           | 853 | Cholelithiasis and cholecystitis                             | 1193 | Pathologic fracture of vertebrae                   |
| 174 | Hyperparathyroidism                                           | 514 | Chronic rheumatic disease of the heart valves      | 854 | Cholelithiasis                                               | 1194 | Stress fracture                                    |
| 175 | Hypoparathyroidism                                            | 515 | Mitral valve stenosis and/or aortic valve stenosis | 855 | Cholelithiasis with acute cholecystitis                      | 1195 | Osteopenia                                         |
| 176 | Disorders of the pituitary gland and its hypothalamic control | 516 | Mitral stenosis/insufficiency                      | 856 | Cholelithiasis with other cholecystitis                      | 1196 | Pain in joint                                      |
| 177 | Pituitary hyperfunction                                       | 517 | Disease of tricuspid valve                         | 857 | Calculus of bile duct                                        | 1197 | Cardiac and circulatory congenital anomalies       |
| 178 | Pituitary hypofunction                                        | 518 | Heart valve disorders                              | 858 | Cholecystitis without cholelithiasis                         | 1198 | Cardiac congenital anomalies                       |
| 179 | Posterior pituitary disorders                                 | 519 | Nonrheumatic mitral valve disorders                | 859 | Other biliary tract disease                                  | 1199 | Cardiac shunt/ heart septal defect                 |
| 180 | Anterior pituitary disorders                                  | 520 | Nonrheumatic aortic valve disorders                | 860 | Cholangitis                                                  | 1200 | Valvular heart disease/ heart chambers             |
| 181 | Disorders of adrenal glands                                   | 521 | Nonrheumatic tricuspid valve disorders             | 861 | Obstruction of bile duct                                     | 1201 | Congenital anomalies of great vessels              |
| 182 | Adrenal hyperfunction                                         | 522 | Nonrheumatic pulmonary valve disorders             | 862 | Other disorders of gallbladder                               | 1202 | Congenital anomalies of peripheral vascular system |
| 183 | Adrenal hypofunction                                          | 523 | Heart valve replaced                               | 863 | Other disorders of biliary tract                             | 1203 | Congenital anomalies of face and neck              |
| 184 | Other disorders of adrenal glands                             | 524 | Abnormal heart sounds                              | 864 | Diseases of pancreas                                         | 1204 | Digestive congenital anomalies                     |
| 185 | Ovarian dysfunction                                           | 525 | Hypertension                                       | 865 | Acute pancreatitis                                           | 1205 | Upper gastrointestinal congenital anomalies        |
| 186 | Polycystic ovaries                                            | 526 | Essential hypertension                             | 866 | Chronic pancreatitis                                         | 1206 | Esophageal atresia/tracheoesophageal fistula       |
| 187 | Testicular dysfunction                                        | 527 | Hypertensive heart and/or renal disease            | 867 | Cyst and pseudocyst of pancreas                              | 1207 | Lower gastrointestinal congenital anomalies        |
| 188 | Testicular hypofunction                                       | 528 | Hypertensive heart disease                         | 868 | Gastrointestinal hemorrhage                                  | 1208 | Congenital anomalies of intestine                  |
| 189 | Other endocrine disorders                                     | 529 | Hypertensive chronic kidney disease                | 869 | Hematemesis                                                  | 1209 | Genitourinary congenital anomalies                 |
| 190 | Protein-calorie malnutrition                                  | 530 | Other hypertensive complications                   | 870 | Blood in stool                                               | 1210 | Congenital anomalies of genital organs             |

|     |                                                             |     |                                                          |     |                                                                 |      |                                                             |
|-----|-------------------------------------------------------------|-----|----------------------------------------------------------|-----|-----------------------------------------------------------------|------|-------------------------------------------------------------|
| 191 | Cachexia                                                    | 531 | Elevated blood pressure reading                          | 871 | Hemorrhage of rectum and anus                                   | 1211 | Congenital anomalies of urinary system                      |
| 192 | severe protein-calorie malnutrition                         | 532 | Ischemic Heart Disease                                   | 872 | Hemorrhage of gastrointestinal tract                            | 1212 | Cystic kidney disease                                       |
| 193 | Abnormal loss of weight and underweight                     | 533 | Unstable angina (intermediate coronary syndrome)         | 873 | Other symptoms involving abdomen and pelvis                     | 1213 | Nervous system congenital anomalies                         |
| 194 | Anorexia                                                    | 534 | Myocardial infarction                                    | 874 | Nephritis; nephrosis; renal sclerosis                           | 1214 | Congenital anomalies of the eye                             |
| 195 | Vitamin deficiency                                          | 535 | Angina pectoris                                          | 875 | Glomerulonephritis                                              | 1215 | Congenital cataract and lens anomalies                      |
| 196 | Vitamin B-complex deficiencies                              | 536 | Coronary atherosclerosis                                 | 876 | Chronic glomerulonephritis                                      | 1216 | Congenital anomalies of posterior segment of eye            |
| 197 | Vitamin D deficiency                                        | 537 | Aneurysm and dissection of heart                         | 877 | Nephrotic syndrome without mention of glomerulonephritis        | 1217 | Congenital musculoskeletal deformities of spine             |
| 198 | Lack of normal physiological development                    | 538 | Chronic ischemic heart disease                           | 878 | Nephritis and nephropathy without mention of glomerulonephritis | 1218 | Spondylolisthesis, congenital                               |
| 199 | Failure to thrive                                           | 539 | Other acute and subacute forms of ischemic heart disease | 879 | Nephritis and nephropathy in diseases classified elsewhere      | 1219 | Congenital anomalies of limbs                               |
| 200 | Proteinuria                                                 | 540 | Other forms of chronic heart disease                     | 880 | Nephritis & nephropathy                                         | 1220 | Congenital deformities of feet                              |
| 201 | Protein plasma/amino-acid transport and metabolism disorder | 541 | ASCVD                                                    | 881 | Renal failure                                                   | 1221 | Congenital anomalies of lower limb, including pelvic girdle |
| 202 | Disturbances of amino-acid transport                        | 542 | pulmonary heart disease                                  | 882 | Acute renal failure                                             | 1222 | Congenital musculoskeletal anomalies                        |
| 203 | Disturbances of sulphur-bearing amino-acid metabolism       | 543 | Pulmonary embolism and infarction                        | 883 | Renal failure NOS                                               | 1223 | Other congenital anomalies                                  |
| 204 | Plasma protein metabolism disorder                          | 544 | Primary pulmonary hypertension                           | 884 | Chronic renal failure                                           | 1224 | Back pain                                                   |
| 205 | Paraproteinemia                                             | 545 | Cardiomegaly                                             | 885 | Renal dialysis                                                  | 1225 | Neck pain                                                   |
| 206 | Other specified disorders of plasma protein metabolism      | 546 | Precordial pain                                          | 886 | End stage renal disease                                         | 1226 | Thoracic neuritis/radiculitis                               |
| 207 | Carbohydrate transport and metabolism disorder              | 547 | Carditis                                                 | 887 | Chronic kidney disease, Stage I or II                           | 1227 | Sciatica                                                    |
| 208 | Disaccharide malabsorption                                  | 548 | Pericarditis                                             | 888 | Other disorders of the kidney and                               | 1228 | Cervical radiculitis                                        |

|     |                                                        |     |                                      |     |                                                  |      |                                                        |
|-----|--------------------------------------------------------|-----|--------------------------------------|-----|--------------------------------------------------|------|--------------------------------------------------------|
|     |                                                        |     |                                      |     | ureters                                          |      |                                                        |
| 209 | Disorders of lipid metabolism                          | 549 | Acute pericarditis                   | 889 | Cyst of kidney, acquired                         | 1229 | Neuralgia, neuritis, and radiculitis NOS               |
| 210 | Hyperlipidemia                                         | 550 | Endocarditis                         | 890 | Vascular disorders of kidney/hypertrophy         | 1230 | Cervicocranial/Cervicobrachial syndrome                |
| 211 | Hypercholesterolemia                                   | 551 | Other rheumatic heart disease        | 891 | Stricture/obstruction of ureter                  | 1231 | Nonallopathic lesions NEC                              |
| 212 | Hyperglyceridemia                                      | 552 | Cardiomyopathy                       | 892 | Kidney replaced by transpant                     | 1232 | Myalgia and myositis NOS                               |
| 213 | Mixed hyperlipidemia                                   | 553 | Primary/intrinsic cardiomyopathies   | 893 | Disorders resulting from impaired renal function | 1233 | Musculoskeletal symptoms referable to limbs            |
| 214 | Lipoid metabolism disorder NOS                         | 554 | Secondary/extrinsic cardiomyopathies | 894 | Renal osteodystrophy                             | 1234 | Swelling of limb                                       |
| 215 | Gout and other crystal arthropathies                   | 555 | Cardiac conduction disorders         | 895 | Secondary hyperparathyroidism (of renal origin)  | 1235 | Cramp of limb                                          |
| 216 | Gout                                                   | 556 | AV block                             | 896 | Abnormal kidney function                         | 1236 | Symptoms of the muscles                                |
| 217 | Gouty arthropathy                                      | 557 | First degree AV block                | 897 | Infections of kidney                             | 1237 | Muscular wasting and disuse atrophy                    |
| 218 | Crystal arthropathies                                  | 558 | Second degree AV block               | 898 | Urinary tract infection                          | 1238 | Spasm of muscle                                        |
| 219 | Chondrocalcinosis                                      | 559 | Bundle branch block                  | 899 | Cystitis and urethritis                          | 1239 | Muscle weakness                                        |
| 220 | Disorders of mineral metabolism                        | 560 | Right bundle branch block            | 900 | Cystitis                                         | 1240 | Rhabdomyolysis                                         |
| 221 | Iron metabolism disorder                               | 561 | Left bundle branch block             | 901 | Acute cystitis                                   | 1241 | Pain in limb                                           |
| 222 | Magnesium metabolism disorder                          | 562 | Abnormal electrocardiogram           | 902 | Chronic cystitis                                 | 1242 | Symptoms involving nervous and musculoskeletal systems |
| 223 | Calcium/phosphorus disorders                           | 563 | Other cardiac conduction disorders   | 903 | Chronic interstitial cystitis                    | 1243 | Edema                                                  |
| 224 | Hypocalcemia                                           | 564 | Cardiac pacemaker/device in situ     | 904 | Urethritis and urethral syndrome                 | 1244 | Pallor and flushing                                    |
| 225 | Phosphorus metabolism disorder                         | 565 | Cardiac pacemaker in situ            | 905 | Hematuria                                        | 1245 | Fever of unknown origin                                |
| 226 | Hypercalcemia                                          | 566 | Cardiac defibrillator in situ        | 906 | Gross hematuria                                  | 1246 | Abdominal pain                                         |
| 227 | Disorders of fluid, electrolyte, and acid-base balance | 567 | Cardiac dysrhythmias                 | 907 | Microscopic hematuria                            | 1247 | Syncope and collapse                                   |
| 228 | Electrolyte imbalance                                  | 568 | Paroxysmal tachycardia, unspecified  | 908 | Urinary calculus                                 | 1248 | Nausea and vomiting                                    |

|     |                                                             |     |                                           |     |                                                    |      |                                                                         |
|-----|-------------------------------------------------------------|-----|-------------------------------------------|-----|----------------------------------------------------|------|-------------------------------------------------------------------------|
| 229 | Hyperosmolality and/or hyponatremia                         | 569 | Paroxysmal supraventricular tachycardia   | 909 | Calculus of kidney                                 | 1249 | Nonspecific findings on examination of blood                            |
| 230 | Hyposmolality and/or hyponatremia                           | 570 | Paroxysmal ventricular tachycardia        | 910 | Calculus of lower urinary tract                    | 1250 | Elevated sedimentation rate                                             |
| 231 | Hyperpotassemia                                             | 571 | Atrial fibrillation & flutter             | 911 | Calculus of ureter                                 | 1251 | Other abnormal blood chemistry                                          |
| 232 | Hypopotassemia                                              | 572 | Atrial fibrillation                       | 912 | Renal colic                                        | 1252 | Elevated C-reactive protein                                             |
| 233 | Acid-base balance disorder                                  | 573 | Atrial flutter                            | 913 | Hydronephrosis                                     | 1253 | Gangrene                                                                |
| 234 | Acidosis                                                    | 574 | Other specified cardiac dysrhythmias      | 914 | Other disorders of bladder                         | 1254 | Abnormal Papanicolaou smear of cervix and cervical HPV                  |
| 235 | Alkalosis                                                   | 575 | Cardiac arrest & ventricular fibrillation | 915 | Bladder neck obstruction                           | 1255 | Abnormal findings on radiological examination intrathoracic organs      |
| 236 | Hypovolemia                                                 | 576 | Ventricular fibrillation & flutter        | 916 | Functional disorders of bladder                    | 1256 | Abnormal findings on radiological exam of musculoskeletal system        |
| 237 | Fluid overload                                              | 577 | Cardiac arrest                            | 917 | Other disorders of urethra and urinary tract       | 1257 | Abnormal results of function studies                                    |
| 238 | Other disorders of metabolism                               | 578 | Cardiac arrhythmia NOS                    | 918 | Urethral stricture (not specified as infectious)   | 1258 | Abnormal cytological, histological, immunological and DNA test findings |
| 239 | Hyperbilirubinemia                                          | 579 | Premature beats                           | 919 | Urinary complications                              | 1259 | Abnormal tumor markers, elevated CEA or CA 125                          |
| 240 | Other disorders of lipid metabolism and hyperalimentation   | 580 | Supraventricular premature beats          | 920 | Urethral hypermobility/ISD                         | 1260 | Elevated prostate specific antigen                                      |
| 241 | Lipoprotein disorders                                       | 581 | Tachycardia NOS                           | 921 | Abnormal findings on examination of urine          | 1261 | Shock                                                                   |
| 242 | Dysmetabolic syndrome X                                     | 582 | Sinoatrial node dysfunction               | 922 | Other cells and casts in urine                     | 1262 | Malaise and fatigue                                                     |
| 243 | Other disorders of metabolic, endocrine, immunity disorders | 583 | Palpitations                              | 923 | Other nonspecific findings on examination of urine | 1263 | Fracture of lower limb                                                  |
| 244 | Overweight                                                  | 584 | Heart failure                             | 924 | Symptoms/disorders of the urinary                  | 1264 | Fracture of neck of femur                                               |

---

|     |                                                |     |                                                             |     |                                     |      |                                                                    |
|-----|------------------------------------------------|-----|-------------------------------------------------------------|-----|-------------------------------------|------|--------------------------------------------------------------------|
|     |                                                |     |                                                             |     | system                              |      |                                                                    |
| 245 | Obesity                                        | 585 | Systolic/diastolic heart failure                            | 925 | Urinary obstruction                 | 1265 | Fractur of unspecified part of femur                               |
| 246 | Morbid obesity                                 | 586 | Heart failure NOS                                           | 926 | Retention of urine                  | 1266 | Fracture of tibia and fibula                                       |
| 247 | Localized adiposity                            | 587 | Ill-defined descriptions and complications of heart disease | 927 | Dysuria                             | 1267 | Patellar fracture                                                  |
| 248 | Abnormal weight gain                           | 588 | Heart transplant/surgery                                    | 928 | Urinary incontinence                | 1268 | Fracture of ankle and foot                                         |
| 249 | Immune disorders                               | 589 | Abnormal function study of cardiovascular system            | 929 | Frequency of urination and polyuria | 1269 | Fracture of foot                                                   |
| 250 | Immunity deficiency                            | 590 | Symptoms involving cardiovascular system                    | 930 | Oliguria and anuria                 | 1270 | Fracture of pelvis                                                 |
| 251 | Deficiency of humoral immunity                 | 591 | Cardiac complications, not elsewhere classified             | 931 | Symptoms involving urinary system   | 1271 | Fracture of upper limb                                             |
| 252 | Other immunological findings                   | 592 | Intracranial hemorrhage                                     | 932 | Other abnormality of urination      | 1272 | Fracture of humerus                                                |
| 253 | Iron deficiency anemias NOS                    | 593 | Subarachnoid hemorrhage                                     | 933 | Hyperplasia of prostate             | 1273 | Fracture of radius and ulna                                        |
| 254 | Iron deficiency anemias                        | 594 | Intracerebral hemorrhage                                    | 934 | Inflammatory diseases of prostate   | 1274 | Colles' fracture                                                   |
| 255 | Iron deficiency anemia secondary to blood loss | 595 | Subdural hemorrhage                                         | 935 | Prostatitis                         | 1275 | Fracture of clavicle or scapula                                    |
| 256 | Pernicious or B12 deficiency anemia            | 596 | Cerebrovascular disease                                     | 936 | Acute prostatitis                   | 1276 | Fracture of hand or wrist                                          |
| 257 | Megaloblastic anemia                           | 597 | Occlusion and stenosis of precerebral arteries              | 937 | Chronic prostatitis                 | 1277 | Fracture of vertebral column without mention of spinal cord injury |
| 258 | Pernicious anemia                              | 598 | Occlusion of cerebral arteries, with cerebral infarction    | 938 | Orchitis and epididymitis           | 1278 | Fracture of ribs                                                   |
| 259 | Vitamin B12 deficiency anemia                  | 599 | Cerebral atherosclerosis                                    | 939 | Balanoposthitis                     | 1279 | Fracture of unspecified bones                                      |
| 260 | Deficiency anemias NOS                         | 600 | Occlusion of cerebral arteries                              | 940 | Other disorders of prostate         | 1280 | Concussion                                                         |
| 261 | Hereditary hemolytic anemias                   | 601 | Ischemic stroke                                             | 941 | Other disorders of testis           | 1281 | Intracranial hemorrhage (injury)                                   |
| 262 | Other hemoglobinopathies                       | 602 | Cerebral ischemia                                           | 942 | Hydrocele                           | 1282 | Subdural hemorrhage (injury)                                       |
| 263 | Other hereditary hemolytic anemias             | 603 | Transient cerebral ischemia                                 | 943 | Spermatocele                        | 1283 | Subarachnoid hemorrhage (injury)                                   |

---

|     |                                                                  |     |                                                                                      |     |                                               |      |                                                                         |
|-----|------------------------------------------------------------------|-----|--------------------------------------------------------------------------------------|-----|-----------------------------------------------|------|-------------------------------------------------------------------------|
| 264 | Acquired hemolytic anemias                                       | 604 | Cerebral aneurysm                                                                    | 944 | Disorders of penis                            | 1284 | Dislocation                                                             |
| 265 | Aplastic anemia                                                  | 605 | Acute, but ill-defined cerebrovascular disease                                       | 945 | Redundant prepuce and phimosi/BXO             | 1285 | Internal derangement of knee                                            |
| 266 | Pancytopenia                                                     | 606 | Late effects of cerebrovascular disease                                              | 946 | Vascular disorders of penis                   | 1286 | Traumatic arthropathy                                                   |
| 267 | Other anemias                                                    | 607 | Atherosclerosis                                                                      | 947 | Peyronie's disease                            | 1287 | Sprains and strains                                                     |
| 268 | Acute posthemorrhagic anemia                                     | 608 | Atherosclerosis of renal artery                                                      | 948 | Erectile dysfunction                          | 1288 | Muscle/tendon sprain                                                    |
| 269 | Anemia of chronic disease                                        | 609 | Atherosclerosis of the extremities                                                   | 949 | Male genital disorders                        | 1289 | Rotator cuff (capsule) sprain                                           |
| 270 | Anemia in chronic kidney disease                                 | 610 | Atherosclerosis of native arteries of the extremities with ulceration or gangrene    | 950 | Male infertility and abnormal spermatozoa     | 1290 | Joint/ligament sprain                                                   |
| 271 | Anemia in neoplastic disease                                     | 611 | Atherosclerosis of native arteries of the extremities with intermittent claudication | 951 | Infertility, male                             | 1291 | Back & neck sprains                                                     |
| 272 | Anemia NOS                                                       | 612 | Atherosclerosis of aorta                                                             | 952 | Benign mammary dysplasias                     | 1292 | Other sprains and strains                                               |
| 273 | Coagulation defects                                              | 613 | Vascular insufficiency of intestine                                                  | 953 | Cystic mastopathy                             | 1293 | Hemorrhage or hematoma complicating a procedure                         |
| 274 | Congenital coagulation defects                                   | 614 | Other aneurysm                                                                       | 954 | Fibroadenosis of breast                       | 1294 | Complications of transplants and reattached limbs                       |
| 275 | Clotting factor deficiency                                       | 615 | Aortic aneurysm                                                                      | 955 | Benign neoplasm of breast                     | 1295 | Colostomy and enterostomy complication                                  |
| 276 | Hemorrhagic disorder due to intrinsic circulating anticoagulants | 616 | Abdominal aortic aneurysm                                                            | 956 | Abnormal findings on mammogram or breast exam | 1296 | Mechanical complications of cardiac/vascular device, implant, and graft |
| 277 | Hypercoagulable state                                            | 617 | Aneurysm of artery of lower extremity                                                | 957 | Abnormal mammogram                            | 1297 | Mechanical complication of nervous system device, implant, and graft    |
| 278 | Abnormal coagulation profile                                     | 618 | Aneurysm of other specified artery                                                   | 958 | Mammographic microcalcification               | 1298 | Vascular complications of surgery and medical procedures                |
| 279 | Purpura and other hemorrhagic conditions                         | 619 | Peripheral vascular disease                                                          | 959 | Abnormal findings on radiological breast exam | 1299 | Complication of internal orthopedic device                              |
| 280 | Spontaneous ecchymoses                                           | 620 | Raynaud's syndrome                                                                   | 960 | Lump or mass in breast                        | 1300 | Mechanical complication due to other implant and internal device        |

|     |                                            |     |                                                            |     |                                                                     |      |                                        |
|-----|--------------------------------------------|-----|------------------------------------------------------------|-----|---------------------------------------------------------------------|------|----------------------------------------|
| 281 | Thrombocytopenia                           | 621 | Peripheral angiopathy in diseases classified elsewhere     | 961 | Breast conditions, congenital or relating to hormones               | 1301 | Open wounds of head; neck; and trunk   |
| 282 | Primary thrombocytopenia                   | 622 | Other specified peripheral vascular diseases               | 962 | Hypertrophy of breast (Gynecomastia)                                | 1302 | Open wound of eye or eyelid            |
| 283 | Secondary thrombocytopenia                 | 623 | Peripheral arterial disease                                | 963 | Other nonmalignant breast conditions                                | 1303 | Open wound of ear                      |
| 284 | Diseases of white blood cells              | 624 | Arterial embolism and thrombosis                           | 964 | Inflammatory disease of breast                                      | 1304 | Other open wound of head and face      |
| 285 | Decreased white blood cell count           | 625 | Arterial embolism and thrombosis of lower extremity artery | 965 | Mastodynia                                                          | 1305 | Open wound of nose and sinus           |
| 286 | Neutropenia                                | 626 | Polyarteritis nodosa and allied conditions                 | 966 | Other signs and symptoms in breast                                  | 1306 | Open wound of lip and mouth            |
| 287 | Elevated white blood cell count            | 627 | Giant cell arteritis                                       | 967 | Other specified disorders of breast                                 | 1307 | Open wounds of extremities             |
| 288 | Eosinophilia                               | 628 | Arteritis NOS                                              | 968 | Breast disorder NOS                                                 | 1308 | Open wound of hand except finger(s)    |
| 289 | Diseases of blood and blood-forming organs | 629 | Other disorders of arteries and arterioles                 | 969 | Inflammatory diseases of female pelvic organs                       | 1309 | Open wound of finger(s)                |
| 290 | Lymphadenitis                              | 630 | Stricture of artery                                        | 970 | Pelvic peritoneal adhesions, female (postoperative) (postinfection) | 1310 | Open wound of foot except toe(s) alone |
| 291 | Diseases of spleen                         | 631 | Disease of capillaries                                     | 971 | Pelvic inflammatory disease                                         | 1311 | Open wound of toe(s)                   |
| 292 | Polycythemia vera, secondary               | 632 | Nevus, non-neoplastic                                      | 972 | Inflammatory disease of cervix, vagina, and vulva                   | 1312 | Complication of amputation stump       |
| 293 | Abnormality of red blood cells             | 633 | Noninfectious disorders of lymphatic channels              | 973 | Cervicitis and endocervicitis                                       | 1313 | Non-healing surgical wound             |
| 294 | Delirium dementia and amnestic disorders   | 634 | Phlebitis and thrombophlebitis                             | 974 | Vaginitis and vulvovaginitis                                        | 1314 | Posttraumatic wound infection          |
| 295 | Dementias                                  | 635 | Phlebitis and thrombophlebitis of lower extremities        | 975 | Cyst or abscess of Bartholin's gland                                | 1315 | Injuries to the nervous system         |
| 296 | Alzheimer's disease                        | 636 | Venous embolism & thrombosis                               | 976 | Endometriosis                                                       | 1316 | Blister                                |
| 297 | Dementia with cerebral degenerations       | 637 | Deep vein thrombosis                                       | 977 | Genital prolapse                                                    | 1317 | Insect bite                            |



|     |                                                                |     |                                                               |     |                                                                      |      |                                                                 |
|-----|----------------------------------------------------------------|-----|---------------------------------------------------------------|-----|----------------------------------------------------------------------|------|-----------------------------------------------------------------|
| 298 | Senile dementia                                                | 638 | Chronic venous hypertension                                   | 978 | Prolapse of vaginal walls                                            | 1318 | Toxic effect of venom                                           |
| 299 | Vascular dementia                                              | 639 | Varicose veins                                                | 979 | Uterine/Uterovaginal prolapse                                        | 1319 | Allergic reaction to food                                       |
| 300 | Delirium due to conditions classified elsewhere                | 640 | Varicose veins of lower extremity                             | 980 | Prolapse of vaginal vault after hysterectomy                         | 1320 | Contact dermatitis and other eczema due to plants [except food] |
| 301 | Persistent mental disorders due to other conditions            | 641 | Varicose veins of lower extremity, symptomatic                | 981 | Vaginal enterocele, congenital or acquired                           | 1321 | Photodermatitis & sunburn                                       |
| 302 | Other specified nonpsychotic and/or transient mental disorders | 642 | Hemorrhoids                                                   | 982 | Noninflammatory female genital disorders                             | 1322 | Atopic or contact dermatitis                                    |
| 303 | Mental disorders due to brain damage                           | 643 | Chronic venous insufficiency                                  | 983 | Noninflammatory disorders of ovary, fallopian tube, & broad ligament | 1323 | Contact and allergic dermatitis of eyelid                       |
| 304 | Neurological disorders due to brain damage                     | 644 | Encounter for long-term use of anticoagulants/antithrombotics | 984 | Disorders of uterus, NEC                                             | 1324 | Allergy to serum or vaccine                                     |
| 305 | Aphasia/speech disturbance                                     | 645 | Encounter for long-term use of antiplatelets/antithrombotics  | 985 | Noninflammatory disorders of cervix                                  | 1325 | Anaphylactic shock NOS                                          |
| 306 | Mild cognitive impairment                                      | 646 | Encounter for long-term use of aspirin                        | 986 | Noninflammatory disorders of vagina                                  | 1326 | Urticaria                                                       |
| 307 | Memory loss                                                    | 647 | Hypotension                                                   | 987 | Noninflammatory disorders of vulva and perineum                      | 1327 | Allergies, other                                                |
| 308 | Altered mental status                                          | 648 | Orthostatic hypotension                                       | 988 | Endometrial hyperplasia                                              | 1328 | Early complications of trauma or procedure                      |
| 309 | Transient alteration of awareness                              | 649 | Iatrogenic hypotension                                        | 989 | Polyp of female genital organs                                       | 1329 | Poisoning by antibiotics                                        |
| 310 | Hallucinations                                                 | 650 | Hypotension NOS                                               | 990 | Polyp of corpus uteri                                                | 1330 | Adverse effects of antibacterials (not penicillins)             |
| 311 | Symptoms involving head and neck                               | 651 | Other disorders of circulatory system                         | 991 | Mucous polyp of cervix                                               | 1331 | Allergy/adverse effect of penicillin                            |
| 312 | Swelling, mass, or lump in head and neck                       | 652 | Hemorrhage NOS                                                | 992 | Hypertrophy of female genital organs                                 | 1332 | Poisoning by other anti-infectives                              |
| 313 | Schizophrenia and other psychotic disorders                    | 653 | Blood vessel replaced                                         | 993 | Symptoms involving female genital tract                              | 1333 | Sulfonamides                                                    |
| 314 | Schizophrenia                                                  | 654 | Circulatory disease NEC                                       | 994 | Dystrophy of female genital tract                                    | 1334 | Poisoning by hormones and synthetic substitutes                 |

|     |                                                |     |                                          |      |                                                |      |                                                                                          |
|-----|------------------------------------------------|-----|------------------------------------------|------|------------------------------------------------|------|------------------------------------------------------------------------------------------|
| 315 | Paranoid disorders                             | 655 | Acute sinusitis                          | 995  | stress incontinence, female                    | 1335 | Adverse effects of adrenal cortical steroids                                             |
| 316 | Mood disorders                                 | 656 | Acute upper respiratory infections       | 996  | Symptoms associated with female genital organs | 1336 | Adverse effects of insulins and antidiabetic agents                                      |
| 317 | Bipolar                                        | 657 | Acute pharyngitis                        | 997  | Dyspareunia                                    | 1337 | Adverse effects of hormones and synthetic substitutes                                    |
| 318 | Depression                                     | 658 | Acute laryngitis and tracheitis          | 998  | Disorders of menstruation                      | 1338 | Poisoning by primarily systemic agents                                                   |
| 319 | Major depressive disorder                      | 659 | Deviated nasal septum                    | 999  | Irregular menstrual cycle/bleeding             | 1339 | Adverse effects of antineoplastic and immunosuppressive drugs                            |
| 320 | Suicidal ideation or attempt                   | 660 | Nasal polyps                             | 1000 | Absent or infrequent menstruation              | 1340 | Poisoning by agents primarily affecting blood constituents                               |
| 321 | Anxiety, phobic and dissociative disorders     | 661 | Chronic pharyngitis and nasopharyngitis  | 1001 | Excessive or frequent menstruation             | 1341 | Anticoagulants causing adverse effects                                                   |
| 322 | Anxiety disorder                               | 662 | Diseases of the larynx and vocal cords   | 1002 | Irregular menstrual cycle                      | 1342 | Poisoning by analgesics, antipyretics, and antirheumatics                                |
| 323 | Generalized anxiety disorder                   | 663 | Chronic laryngitis                       | 1003 | Irregular menstrual bleeding                   | 1343 | Adverse effects of opiates and related narcotics in therapeutic use                      |
| 324 | Agoraphobia, social phobia, and panic disorder | 664 | Paralysis/spasm of vocal cords or larynx | 1004 | Dysmenorrhea                                   | 1344 | Adverse effects of antirheumatics                                                        |
| 325 | Phobia                                         | 665 | Voice disturbance                        | 1005 | Premenstrual tension syndromes                 | 1345 | Salicylates causing adverse effects in therapeutic use                                   |
| 326 | Obsessive-compulsive disorder                  | 666 | Acute and chronic tonsillitis            | 1006 | Infertility, female                            | 1346 | Poisoning by anticonvulsants and anti-Parkinsonism drugs                                 |
| 327 | Dysthymic disorder                             | 667 | Acute tonsillitis                        | 1007 | Menopausal & postmenopausal disorders          | 1347 | Adverse effects of sedatives or other central nervous system depressants and anesthetics |
| 328 | Acute reaction to stress                       | 668 | Chronic tonsillitis and adenoiditis      | 1008 | Postmenopausal bleeding                        | 1348 | Poisoning by psychotropic agents                                                         |
| 329 | Posttraumatic stress disorder                  | 669 | Chronic sinusitis                        | 1009 | Symptomatic menopause                          | 1349 | Poisoning by agents affecting the cardiovascular                                         |

---

|     |                                                          |     |                                   |      |                                                          |                                                                    |
|-----|----------------------------------------------------------|-----|-----------------------------------|------|----------------------------------------------------------|--------------------------------------------------------------------|
|     |                                                          |     |                                   |      |                                                          | system                                                             |
| 330 | Personality disorders                                    | 670 | Postnasal drip                    | 1010 | Symptomatic artificial menopause                         | 1350 Adverse effects of cardiac rhythm regulators                  |
| 331 | Schizoid personality disorder                            | 671 | Allergic rhinitis                 | 1011 | Postmenopausal hormone replacement                       | 1351 Adverse effects of antilipemic and antiarteriosclerotic drugs |
| 332 | Antisocial/borderline personality disorder               | 672 | Epistaxis or throat hemorrhage    | 1012 | Postmenopausal atrophic vaginitis                        | 1352 Antihypertensive agents causing adverse effects               |
| 333 | Sexual and gender identity disorders                     | 673 | Throat pain                       | 1013 | Premature menopause and other ovarian failure            | 1353 Poisoning by water, mineral, and uric acid metabolism drugs   |
| 334 | Decreased libido                                         | 674 | Other upper respiratory disease   | 1014 | Ovarian cyst                                             | 1354 Personal history of allergy to medicinal agents               |
| 335 | Psychogenic and somatoform disorders                     | 675 | Pneumonia                         | 1015 | Miscarriage; stillbirth                                  | 1355 Adverse drug events and drug allergies                        |
| 336 | Psychogenic disorder                                     | 676 | Bacterial pneumonia               | 1016 | Early or threatened labor; hemorrhage in early pregnancy | 1356 Effects of radiation NOS                                      |
| 337 | Gastrointestinal malfunction arising from mental factors | 677 | Pneumococcal pneumonia            | 1017 | Hemorrhage in early pregnancy                            | 1357 Sepsis and SIRS                                               |
| 338 | Somatoform disorder                                      | 678 | Pseudomonal pneumonia             | 1018 | Hypertension complicating pregnancy                      | 1358 Sepsis                                                        |
| 339 | Adjustment reaction                                      | 679 | Viral pneumonia                   | 1019 | Other conditions of the mother complicating pregnancy    |                                                                    |
| 340 | Tension headache                                         | 680 | Bronchopneumonia and lung abscess | 1020 | Gestational diabetes                                     |                                                                    |

---

Supplementary Table 4: In DGIbd database, 114 candidate gene-matched drugs for genetic factors.

| No | Drug                                 | P-value  | Fdr<0.05 | No | Drug                     | P-value  | Fdr<0.05 |
|----|--------------------------------------|----------|----------|----|--------------------------|----------|----------|
| 1  | Tretinoin                            | 2.06e-07 | 0        | 58 | Polymyxin b              | 7.48e-03 | 3.74e-02 |
| 2  | Ocriplasmin                          | 5.76e-12 | 0        | 59 | Chembl245549             | 7.48e-03 | 3.74e-02 |
| 3  | Collagenase clostridium histolyticum | 2.44e-12 | 0        | 60 | Chembl1233001            | 7.48e-03 | 3.74e-02 |
| 4  | Talarozole                           | 2.87e-07 | 0        | 61 | Glebatumumab vedotin     | 7.48e-03 | 3.74e-02 |
| 5  | Bevacizumab                          | 1.46e-06 | 1.08e-04 | 62 | Ck0106023                | 7.48e-03 | 3.74e-02 |
| 6  | Tromethamine                         | 2.21e-05 | 1.98e-03 | 63 | Filanesib                | 7.48e-03 | 3.74e-02 |
| 7  | Tipifarnib                           | 8.72e-05 | 4.27e-03 | 64 | Ispinesib (chembl228814) | 7.48e-03 | 3.74e-02 |
| 8  | Pumosetrag                           | 8.72e-05 | 4.27e-03 | 65 | Litronesib               | 7.48e-03 | 3.74e-02 |
| 9  | Rg3487                               | 8.72e-05 | 4.27e-03 | 66 | Chembl228369             | 7.48e-03 | 3.74e-02 |
| 10 | Granisetron                          | 8.72e-05 | 4.27e-03 | 67 | (r)-mon-97               | 7.48e-03 | 3.74e-02 |
| 11 | Mofarotene                           | 8.72e-05 | 4.27e-03 | 68 | Chembl380955             | 7.48e-03 | 3.74e-02 |
| 12 | Dorzolamide                          | 2.55e-04 | 9.18e-03 | 69 | Monastrol                | 7.48e-03 | 3.74e-02 |
| 13 | Dolasetron                           | 2.55e-04 | 9.18e-03 | 70 | Chembl205786             | 7.48e-03 | 3.74e-02 |
| 14 | Adapalene                            | 2.55e-04 | 9.18e-03 | 71 | Chembl205437             | 7.48e-03 | 3.74e-02 |
| 15 | Alitretinoin                         | 2.55e-04 | 9.18e-03 | 72 | Chembl481931             | 7.48e-03 | 3.74e-02 |
| 16 | Pemetrexed disodium                  | 6.04e-04 | 2.04e-02 | 73 | Chembl204459             | 7.48e-03 | 3.74e-02 |
| 17 | Cerivastatin                         | 1.23e-03 | 3.31e-02 | 74 | Enzastaurin              | 2.22e-03 | 3.74e-02 |
| 18 | Ascorbate                            | 1.12e-03 | 3.31e-02 | 75 | Chembl217803             | 7.48e-03 | 3.74e-02 |
| 19 | Chembl1188853                        | 1.23e-03 | 3.31e-02 | 76 | Chembl1767409            | 7.48e-03 | 3.74e-02 |
| 20 | Acitretin                            | 1.23e-03 | 3.31e-02 | 77 | Chembl373780             | 7.48e-03 | 3.74e-02 |
| 21 | Triamcinolone                        | 5.70e-03 | 3.74e-02 | 78 | Chembl1765119            | 7.48e-03 | 3.74e-02 |
| 22 | Bupivacaine                          | 3.69e-03 | 3.74e-02 | 79 | Chembl572546             | 7.48e-03 | 3.74e-02 |
| 23 | Irinotecan                           | 5.27e-03 | 3.74e-02 | 80 | Nelarabine               | 7.48e-03 | 3.74e-02 |
| 24 | Denufosol tetrasodium                | 7.48e-03 | 3.74e-02 | 81 | Mk-4721                  | 7.48e-03 | 3.74e-02 |

|    |                            |          |          |     |                    |          |          |
|----|----------------------------|----------|----------|-----|--------------------|----------|----------|
| 25 | Emixustat hydrochloride    | 7.48e-03 | 3.74e-02 | 82  | Chembl275311       | 7.48e-03 | 3.74e-02 |
| 26 | Tafamidis meglumine        | 7.48e-03 | 3.74e-02 | 83  | Ischemin           | 7.48e-03 | 3.74e-02 |
| 27 | Chembl1232343              | 7.48e-03 | 3.74e-02 | 84  | Chembl1236441      | 7.48e-03 | 3.74e-02 |
| 28 | Chembl503075               | 7.48e-03 | 3.74e-02 | 85  | Chembl332486       | 7.48e-03 | 3.74e-02 |
| 29 | Chembl472925               | 7.48e-03 | 3.74e-02 | 86  | Sdx-101            | 7.48e-03 | 3.74e-02 |
| 30 | Chembl574602               | 7.48e-03 | 3.74e-02 | 87  | Gsk-249320         | 7.48e-03 | 3.74e-02 |
| 31 | Chembl2064657              | 7.48e-03 | 3.74e-02 | 88  | Lerdelimumab       | 7.48e-03 | 3.74e-02 |
| 32 | Chembl475346               | 7.48e-03 | 3.74e-02 | 89  | Trabedersen        | 7.48e-03 | 3.74e-02 |
| 33 | Dexniguldipine             | 7.48e-03 | 3.74e-02 | 90  | Belagenpumatucl-l  | 7.48e-03 | 3.74e-02 |
| 34 | Chembl89093                | 7.48e-03 | 3.74e-02 | 91  | Afelimomab         | 7.48e-03 | 3.74e-02 |
| 35 | Chembl340868               | 7.48e-03 | 3.74e-02 | 92  | Placulumab         | 7.48e-03 | 3.74e-02 |
| 36 | Chembl317382               | 7.48e-03 | 3.74e-02 | 93  | Golimumab          | 7.48e-03 | 3.74e-02 |
| 37 | Chembl329722               | 7.48e-03 | 3.74e-02 | 94  | Certolizumab pegol | 7.48e-03 | 3.74e-02 |
| 38 | Chembl321845               | 7.48e-03 | 3.74e-02 | 95  | Cromolyn sodium    | 7.48e-03 | 3.74e-02 |
| 39 | Chembl322524               | 7.48e-03 | 3.74e-02 | 96  | Talactoferrin alfa | 7.48e-03 | 3.74e-02 |
| 40 | Chembl108705               | 7.48e-03 | 3.74e-02 | 97  | Delmitide          | 7.48e-03 | 3.74e-02 |
| 41 | Chembl118044               | 7.48e-03 | 3.74e-02 | 98  | Chembl219629       | 7.48e-03 | 3.74e-02 |
| 42 | Chembl130499               | 7.48e-03 | 3.74e-02 | 99  | Ozoralizumab       | 7.48e-03 | 3.74e-02 |
| 43 | Chembl71053                | 7.48e-03 | 3.74e-02 | 100 | Meropenem          | 7.48e-03 | 3.74e-02 |
| 44 | Chembl1208337              | 7.48e-03 | 3.74e-02 | 101 | Lenercept          | 7.48e-03 | 3.74e-02 |
| 45 | Mifamurtide sodium hydrate | 7.48e-03 | 3.74e-02 | 102 | Nerelimomab        | 7.48e-03 | 3.74e-02 |
| 46 | Celecoxib                  | 6.67e-03 | 3.74e-02 | 103 | Onercept           | 7.48e-03 | 3.74e-02 |
| 47 | Nms-1116354                | 7.48e-03 | 3.74e-02 | 104 | Pegsunercept       | 7.48e-03 | 3.74e-02 |
| 48 | Rxdx-103                   | 7.48e-03 | 3.74e-02 | 105 | Az-9773            | 7.48e-03 | 3.74e-02 |
| 49 | Bms-863233 (chembl3544943) | 7.48e-03 | 3.74e-02 | 106 | Hexafluorenium     | 7.48e-03 | 3.74e-02 |
| 50 | Chembl179583               | 7.48e-03 | 3.74e-02 | 107 | Emixustat          | 7.48e-03 | 3.74e-02 |

---

|    |                                             |          |          |     |               |          |          |
|----|---------------------------------------------|----------|----------|-----|---------------|----------|----------|
| 51 | Regorafenib                                 | 2.14e-03 | 3.74e-02 | 108 | Tafamidis     | 7.48e-03 | 3.74e-02 |
| 52 | Phosphomethylphosphonic acid guanosyl ester | 7.48e-03 | 3.74e-02 | 109 | Vandetanib    | 7.66e-03 | 3.76e-02 |
| 53 | Vonapanitase                                | 7.48e-03 | 3.74e-02 | 110 | Retinol       | 7.66e-03 | 3.76e-02 |
| 54 | Cerulein                                    | 7.48e-03 | 3.74e-02 | 111 | Ibudilast     | 8.33e-03 | 3.98e-02 |
| 55 | Propylthiouracil                            | 3.69e-03 | 3.74e-02 | 112 | Linifanib     | 8.33e-03 | 3.98e-02 |
| 56 | Cep-11981                                   | 3.69e-03 | 3.74e-02 | 113 | Tedatioxetine | 8.33e-03 | 3.98e-02 |
| 57 | Ce-245677                                   | 7.48e-03 | 3.74e-02 | 114 | Everolimus    | 9.09e-03 | 4.31e-02 |

---

Supplementary Table 5. KEGG glaucoma drug targeted 13 genes, 242 chemicals are enriched in clue database for these genes .

| No | Drug                      | P-values | FDR<0.05 | No  | Drug                            | P-values | FDR<0.05 | No  | Drug                      | P-values | FDR<0.05 |
|----|---------------------------|----------|----------|-----|---------------------------------|----------|----------|-----|---------------------------|----------|----------|
| 1  | Choline                   | 0        | 0        | 82  | Hydroxyamphetamine hydrobromide | 0        | 0        | 163 | Alcuronium                | 2.77e-03 | 9.01e-03 |
| 2  | Gallamine triethiodide    | 0        | 0        | 83  | Batefenterol                    | 0        | 0        | 164 | Brucine                   | 2.82e-03 | 9.10e-03 |
| 3  | Demecarium                | 0        | 0        | 84  | Epinephrine                     | 0        | 0        | 165 | Chembl343357              | 2.86e-03 | 9.20e-03 |
| 4  | Physostigmine             | 0        | 0        | 85  | Galantamine hydrobromide        | 6.83e-07 | 5.96e-06 | 166 | Chembl343796              | 2.91e-03 | 9.30e-03 |
| 5  | Ambenonium                | 0        | 0        | 86  | Edrophonium chloride            | 1.33e-06 | 5.96e-06 | 167 | Chembl139677              | 2.96e-03 | 9.39e-03 |
| 6  | Tubocurarine              | 0        | 0        | 87  | Promethazine                    | 5.29e-07 | 5.96e-06 | 168 | Trimipramine maleate      | 3.04e-03 | 9.59e-03 |
| 7  | Decamethonium             | 0        | 0        | 88  | Thiethylperazine                | 5.80e-07 | 5.96e-06 | 169 | Chembl2206331             | 3.06e-03 | 9.59e-03 |
| 8  | Echothiophate             | 0        | 0        | 89  | Doxepin                         | 6.35e-07 | 5.96e-06 | 170 | Chembl1256845             | 3.11e-03 | 9.69e-03 |
| 9  | Neostigmine methylsulfate | 0        | 0        | 90  | Neostigmine                     | 2.43e-06 | 1.18e-05 | 171 | Vinburnine                | 3.16e-03 | 9.79e-03 |
| 10 | Hexafluorenum bromide     | 0        | 0        | 91  | Isoflurophate                   | 2.72e-06 | 1.66e-05 | 172 | Vincamine                 | 3.21e-03 | 9.89e-03 |
| 11 | Pyridostigmine bromide    | 0        | 0        | 92  | Malathion                       | 3.36e-06 | 1.66e-05 | 173 | Alfuzosin hydrochloride   | 3.37e-03 | 1.03e-02 |
| 12 | Tacrine hydrochloride     | 0        | 0        | 93  | Labetalol hydrochloride         | 2.66e-06 | 1.66e-05 | 174 | Strychnine                | 3.36e-03 | 1.03e-02 |
| 13 | Rivastigmine              | 0        | 0        | 94  | Mephentermine sulfate           | 2.82e-06 | 1.66e-05 | 175 | 4-damp                    | 3.42e-03 | 1.03e-02 |
| 14 | Donepezil                 | 0        | 0        | 95  | Carvedilol phosphate            | 3.36e-06 | 1.66e-05 | 176 | Chembl279453              | 3.47e-03 | 1.05e-02 |
| 15 | Dipivefrin                | 0        | 0        | 96  | Dipivefrin hydrochloride        | 3.46e-06 | 1.66e-05 | 177 | Dothiepin (chembl1492500) | 3.58e-03 | 1.07e-02 |
| 16 | Aripiprazole              | 0        | 0        | 97  | Phenserine                      | 7.43e-06 | 3.82e-05 | 178 | Chembl580785              | 3.63e-03 | 1.08e-02 |
| 17 | Olanzapine                | 0        | 0        | 98  | Itopride                        | 1.07e-05 | 5.95e-05 | 179 | Himbacine                 | 3.69e-03 | 1.09e-02 |
| 18 | Loxapine                  | 0        | 0        | 99  | Dapiprazole                     | 1.34e-05 | 6.96e-05 | 180 | Prazosin hydrochloride    | 3.73e-03 | 1.10e-02 |
| 19 | Promazine                 | 0        | 0        | 100 | Risperidone                     | 1.50e-05 | 7.95e-05 | 181 | Chembl1256682             | 3.75e-03 | 1.10e-02 |
| 20 | Propiomazine              | 0        | 0        | 101 | Pralidoxime                     | 1.69e-05 | 8.92e-05 | 182 | Methoctramine             | 3.80e-03 | 1.11e-02 |
| 21 | Carvedilol                | 0        | 0        | 102 | Periciazine                     | 1.76e-05 | 9.35e-05 | 183 | Hydrochloric acid         | 3.86e-03 | 1.12e-02 |
| 22 | Dronedarone               | 0        | 0        | 103 | Silodosin                       | 2.06e-05 | 1.08e-04 | 184 | Otenzepad                 | 3.92e-03 | 1.13e-02 |
| 23 | Epinephrine bitartrate    | 0        | 0        | 104 | Xylometazoline                  | 2.29e-05 | 1.17e-04 | 185 | Pirenzepine               | 3.98e-03 | 1.14e-02 |

|    |                             |   |   |     |                             |          |          |     |                           |          |          |
|----|-----------------------------|---|---|-----|-----------------------------|----------|----------|-----|---------------------------|----------|----------|
| 24 | Phenylephrine               | 0 | 0 | 105 | Methadone                   | 2.50e-05 | 1.25e-04 | 186 | Methoxamine hydrochloride | 4.11e-03 | 1.17e-02 |
| 25 | Doxazosin                   | 0 | 0 | 106 | Cirazoline                  | 2.53e-05 | 1.25e-04 | 187 | Coenzyme_a                | 4.10e-03 | 1.17e-02 |
| 26 | Terazosin                   | 0 | 0 | 107 | Magnesium chloride          | 3.60e-05 | 1.78e-04 | 188 | Quinuclidinyl benzilate   | 4.16e-03 | 1.17e-02 |
| 27 | Tamsulosin                  | 0 | 0 | 108 | Huperzine b                 | 6.94e-05 | 3.39e-04 | 189 | Tripitramine              | 4.28e-03 | 1.20e-02 |
| 28 | Fenoldopam                  | 0 | 0 | 109 | Albiflorin                  | 7.18e-05 | 3.50e-04 | 190 | Chemb11233686             | 4.34e-03 | 1.21e-02 |
| 29 | Bethanidine                 | 0 | 0 | 110 | Sertindole                  | 7.48e-05 | 3.61e-04 | 191 | Chemb11628667             | 4.41e-03 | 1.22e-02 |
| 30 | Labetalol                   | 0 | 0 | 111 | Chembl609728                | 7.79e-05 | 3.72e-04 | 192 | Afacifenacin              | 4.47e-03 | 1.23e-02 |
| 31 | Metoprolol succinate        | 0 | 0 | 112 | Debrisoquin                 | 8.11e-05 | 3.83e-04 | 193 | Asm-024                   | 4.54e-03 | 1.25e-02 |
| 32 | Isoetharine                 | 0 | 0 | 113 | Senrebotase                 | 8.44e-05 | 3.94e-04 | 194 | Trospium chloride         | 4.60e-03 | 1.26e-02 |
| 33 | Propranolol                 | 0 | 0 | 114 | Atenolol                    | 8.78e-05 | 4.09e-04 | 195 | Homatropine methylbromide | 4.67e-03 | 1.27e-02 |
| 34 | Pirbuterol                  | 0 | 0 | 115 | Mirtazapine                 | 9.13e-05 | 4.19e-04 | 196 | Cyproheptadine            | 4.94e-03 | 1.34e-02 |
| 35 | Betaxolol                   | 0 | 0 | 116 | Betamethasone               | 9.33e-05 | 4.25e-04 | 197 | Phentolamine              | 5.87e-03 | 1.58e-02 |
| 36 | Dobutamine                  | 0 | 0 | 117 | Phenylpropanolamine         | 9.49e-05 | 4.30e-04 | 198 | ( )-cyclazosin            | 6.89e-03 | 1.84e-02 |
| 37 | Oxprenolol hydrochloride    | 0 | 0 | 118 | Alprenolol                  | 9.87e-05 | 4.45e-04 | 199 | Echothiophate iodide      | 7.45e-03 | 1.98e-02 |
| 38 | Metipranolol hydrochloride  | 0 | 0 | 119 | Pindolol                    | 1.03e-04 | 4.59e-04 | 200 | Tacrine                   | 7.54e-03 | 2.00e-02 |
| 39 | Penbutolol sulfate          | 0 | 0 | 120 | Isoprenaline                | 1.06e-04 | 4.68e-04 | 201 | Edrophonium               | 7.63e-03 | 2.01e-02 |
| 40 | Sotalol hydrochloride       | 0 | 0 | 121 | Arbutamine                  | 1.11e-04 | 4.86e-04 | 202 | Demecarium bromide        | 7.72e-03 | 2.03e-02 |
| 41 | Timolol maleate             | 0 | 0 | 122 | Nadolol                     | 1.15e-04 | 5.00e-04 | 203 | Midodrine                 | 8.01e-03 | 2.08e-02 |
| 42 | Nebivolol hydrochloride     | 0 | 0 | 123 | Fenoterol                   | 1.19e-04 | 5.13e-04 | 204 | Pyridostigmine            | 8.00e-03 | 2.08e-02 |
| 43 | Levobunolol hydrochloride   | 0 | 0 | 124 | Oxymetazoline hydrochloride | 1.23e-04 | 5.26e-04 | 205 | Rivastigmine tartrate     | 8.19e-03 | 2.12e-02 |
| 44 | Isoproterenol hydrochloride | 0 | 0 | 125 | Bevantolol                  | 1.24e-04 | 5.26e-04 | 206 | Ergotamine                | 8.48e-03 | 2.18e-02 |
| 45 | Esmolol hydrochloride       | 0 | 0 | 126 | Clenbuterol                 | 1.33e-04 | 5.59e-04 | 207 | Nefazodone                | 8.60e-03 | 2.19e-02 |
| 46 | Propafenone hydrochloride   | 0 | 0 | 127 | Celiprolol                  | 1.38e-04 | 5.76e-04 | 208 | Methoxamine               | 8.57e-03 | 2.19e-02 |
| 47 | Desipramine                 | 0 | 0 | 128 | Bopindolol                  | 1.48e-04 | 6.13e-04 | 209 | Quetiapine                | 9.22e-03 | 2.34e-02 |
| 48 | Isoproterenol               | 0 | 0 | 129 | Bupranolol                  | 1.53e-04 | 6.29e-04 | 210 | Alfuzosin                 | 9.80e-03 | 2.47e-02 |
| 49 | Carteolol                   | 0 | 0 | 130 | Metaraminol bitartrate      | 1.60e-04 | 6.47e-04 | 211 | Trazodone                 | 9.86e-03 | 2.48e-02 |



|    |                            |   |   |     |                                |          |          |     |                           |          |          |
|----|----------------------------|---|---|-----|--------------------------------|----------|----------|-----|---------------------------|----------|----------|
| 50 | Glycopyrrolate bromide     | 0 | 0 | 131 | Ly377604                       | 1.59e-04 | 6.47e-04 | 212 | Prazosin                  | 9.91e-03 | 2.48e-02 |
| 51 | Mivacurium                 | 0 | 0 | 132 | Bucindolol                     | 1.76e-04 | 7.07e-04 | 213 | Levobunolol               | 1.01e-02 | 2.52e-02 |
| 52 | Oxyphencyclimine           | 0 | 0 | 133 | Bambuterol                     | 1.95e-04 | 7.77e-04 | 214 | Metipranolol              | 1.02e-02 | 2.53e-02 |
| 53 | Darifenacin                | 0 | 0 | 134 | Las190792                      | 3.51e-04 | 1.39e-03 | 215 | Penbutolol                | 1.03e-02 | 2.55e-02 |
| 54 | Tridihexethyl              | 0 | 0 | 135 | Suxamethonium                  | 4.65e-04 | 1.83e-03 | 216 | Oxprenolol                | 1.05e-02 | 2.56e-02 |
| 55 | Benzquinamide              | 0 | 0 | 136 | Paliperidone                   | 6.86e-04 | 2.67e-03 | 217 | Nebivolol                 | 1.06e-02 | 2.58e-02 |
| 56 | Brompheniramine            | 0 | 0 | 137 | Naphazoline hydrochloride      | 9.53e-04 | 3.69e-03 | 218 | Levobetaxolol             | 1.08e-02 | 2.62e-02 |
| 57 | Tolterodine                | 0 | 0 | 138 | Tetrahydrozoline hydrochloride | 1.11e-03 | 4.26e-03 | 219 | Sotalol                   | 1.09e-02 | 2.64e-02 |
| 58 | Pilocarpine                | 0 | 0 | 139 | Dextroamphetamine              | 1.28e-03 | 4.90e-03 | 220 | Dobutamine hydrochloride  | 1.11e-02 | 2.68e-02 |
| 59 | Pipecuronium               | 0 | 0 | 140 | Phendimetrazine                | 1.48e-03 | 5.59e-03 | 221 | Propranolol hydrochloride | 1.15e-02 | 2.75e-02 |
| 60 | Fesoterodine               | 0 | 0 | 141 | Methamphetamine                | 1.69e-03 | 6.34e-03 | 222 | Carteolol hydrochloride   | 1.16e-02 | 2.77e-02 |
| 61 | Aclidinium                 | 0 | 0 | 142 | Lisdexamfetamine               | 1.92e-03 | 7.15e-03 | 223 | Timolol                   | 1.18e-02 | 2.81e-02 |
| 62 | Umeclidinium               | 0 | 0 | 143 | Darotropium bromide            | 1.99e-03 | 7.36e-03 | 224 | Papaverine                | 1.34e-02 | 3.18e-02 |
| 63 | Acetylcholine              | 0 | 0 | 144 | Methixene                      | 2.02e-03 | 7.45e-03 | 225 | Glycopyrrolate            | 1.40e-02 | 3.29e-02 |
| 64 | Bethanechol                | 0 | 0 | 145 | Terfenadine                    | 2.06e-03 | 7.53e-03 | 226 | Cyproterone acetate       | 1.42e-02 | 3.32e-02 |
| 65 | Xanomeline                 | 0 | 0 | 146 | Procyclidine                   | 2.10e-03 | 7.62e-03 | 227 | Dicyclomine               | 1.42e-02 | 3.32e-02 |
| 66 | Amitriptyline              | 0 | 0 | 147 | Hyoscyamine                    | 2.14e-03 | 7.70e-03 | 228 | Hexocyclium               | 1.44e-02 | 3.34e-02 |
| 67 | Benztropine mesylate       | 0 | 0 | 148 | Ergotamine tartrate            | 2.17e-03 | 7.74e-03 | 229 | Solifenacin succinate     | 1.45e-02 | 3.36e-02 |
| 68 | Atropine                   | 0 | 0 | 149 | Anisotropine methylbromide     | 2.18e-03 | 7.74e-03 | 230 | Propantheline bromide     | 1.46e-02 | 3.37e-02 |
| 69 | Biperiden (chembl1101)     | 0 | 0 | 150 | Scopolamine                    | 2.21e-03 | 7.83e-03 | 231 | Bethanechol chloride      | 1.48e-02 | 3.39e-02 |
| 70 | Ipratropium                | 0 | 0 | 151 | Tropicamide                    | 2.25e-03 | 7.91e-03 | 232 | Fesoterodine fumarate     | 1.49e-02 | 3.41e-02 |
| 71 | Oxybutynin                 | 0 | 0 | 152 | Diphenidol                     | 2.34e-03 | 8.15e-03 | 233 | Amphetamine               | 1.50e-02 | 3.41e-02 |
| 72 | Propantheline              | 0 | 0 | 153 | Chlorprothixene                | 2.38e-03 | 8.23e-03 | 234 | Darifenacin hydrobromide  | 1.51e-02 | 3.41e-02 |
| 73 | Solifenacin                | 0 | 0 | 154 | Arecaidine propargyl ester     | 2.42e-03 | 8.33e-03 | 235 | Atropine sulfate          | 1.52e-02 | 3.43e-02 |
| 74 | Clidinium                  | 0 | 0 | 155 | Arecoline                      | 2.46e-03 | 8.42e-03 | 236 | Oxybutynin chloride       | 1.53e-02 | 3.44e-02 |
| 75 | Tiotropium (chembl1900528) | 0 | 0 | 156 | Furtrethonium                  | 2.50e-03 | 8.51e-03 | 237 | Tolterodine tartrate      | 1.55e-02 | 3.46e-02 |

---

|    |                 |   |   |     |                             |          |          |     |                       |          |          |
|----|-----------------|---|---|-----|-----------------------------|----------|----------|-----|-----------------------|----------|----------|
| 76 | Norepinephrine  | 0 | 0 | 157 | 5-methylfurmethiodide       | 2.55e-03 | 8.60e-03 | 238 | Isoproterenol sulfate | 1.83e-02 | 4.07e-02 |
| 77 | Cabergoline     | 0 | 0 | 158 | Chembl99521                 | 2.59e-03 | 8.69e-03 | 239 | Mephentermine         | 1.85e-02 | 4.10e-02 |
| 78 | Clozapine       | 0 | 0 | 159 | Eribaxaban                  | 2.63e-03 | 8.78e-03 | 240 | Metoprolol            | 1.86e-02 | 4.10e-02 |
| 79 | Levomepromazine | 0 | 0 | 160 | Oxotremorine                | 2.68e-03 | 8.88e-03 | 241 | Vortioxetine          | 1.94e-02 | 4.27e-02 |
| 80 | Droxidopa       | 0 | 0 | 161 | Phenylephrine hydrochloride | 2.73e-03 | 8.92e-03 | 242 | Acetololol            | 2.23e-02 | 4.89e-02 |
| 81 | Noradrenaline   | 0 | 0 | 162 | Chembl130715                | 2.73e-03 | 8.92e-03 |     |                       |          |          |

---

Supplementary Table 6. In clue database, 133 chemicals returned for glaucoma genes.

| No | Drug                      | P-values | FDR<0.05 | No  | Drug                            | P-values | FDR<0.05 | No  | Drug                         | P-values | FDR<0.05 |
|----|---------------------------|----------|----------|-----|---------------------------------|----------|----------|-----|------------------------------|----------|----------|
| 1  | Choline                   | 0        | 0        | 82  | Hydroxyamphetamine hydrobromide | 0        | 0        | 163 | Alcuronium                   | 2.77e-03 | 9.01e-03 |
| 2  | Gallamine triethiodide    | 0        | 0        | 83  | Batefenterol                    | 0        | 0        | 164 | Brucine                      | 2.82e-03 | 9.10e-03 |
| 3  | Demecarium                | 0        | 0        | 84  | Epinephrine                     | 0        | 0        | 165 | Chembl343357                 | 2.86e-03 | 9.20e-03 |
| 4  | Physostigmine             | 0        | 0        | 85  | Galantamine hydrobromide        | 6.83e-07 | 5.96e-06 | 166 | Chembl343796                 | 2.91e-03 | 9.30e-03 |
| 5  | Ambenonium                | 0        | 0        | 86  | Edrophonium chloride            | 1.33e-06 | 5.96e-06 | 167 | Chembl139677                 | 2.96e-03 | 9.39e-03 |
| 6  | Tubocurarine              | 0        | 0        | 87  | Promethazine                    | 5.29e-07 | 5.96e-06 | 168 | Trimipramine maleate         | 3.04e-03 | 9.59e-03 |
| 7  | Decamethonium             | 0        | 0        | 88  | Thiethylperazine                | 5.80e-07 | 5.96e-06 | 169 | Chembl2206331                | 3.06e-03 | 9.59e-03 |
| 8  | Echothiophate             | 0        | 0        | 89  | Doxepin                         | 6.35e-07 | 5.96e-06 | 170 | Chembl1256845                | 3.11e-03 | 9.69e-03 |
| 9  | Neostigmine methylsulfate | 0        | 0        | 90  | Neostigmine                     | 2.43e-06 | 1.18e-05 | 171 | Vinburnine                   | 3.16e-03 | 9.79e-03 |
| 10 | Hexafluorenum bromide     | 0        | 0        | 91  | Isoflurophate                   | 2.72e-06 | 1.66e-05 | 172 | Vincamine                    | 3.21e-03 | 9.89e-03 |
| 11 | Pyridostigmine bromide    | 0        | 0        | 92  | Malathion                       | 3.36e-06 | 1.66e-05 | 173 | Alfuzosin hydrochloride      | 3.37e-03 | 1.03e-02 |
| 12 | Tacrine hydrochloride     | 0        | 0        | 93  | Labetalol hydrochloride         | 2.66e-06 | 1.66e-05 | 174 | Strychnine                   | 3.36e-03 | 1.03e-02 |
| 13 | Rivastigmine              | 0        | 0        | 94  | Mephentermine sulfate           | 2.82e-06 | 1.66e-05 | 175 | 4-damp                       | 3.42e-03 | 1.03e-02 |
| 14 | Donepezil                 | 0        | 0        | 95  | Carvedilol phosphate            | 3.36e-06 | 1.66e-05 | 176 | Chembl279453                 | 3.47e-03 | 1.05e-02 |
| 15 | Dipivefrin                | 0        | 0        | 96  | Dipivefrin hydrochloride        | 3.46e-06 | 1.66e-05 | 177 | Dothiepin<br>(chembl1492500) | 3.58e-03 | 1.07e-02 |
| 16 | Aripiprazole              | 0        | 0        | 97  | Phenserine                      | 7.43e-06 | 3.82e-05 | 178 | Chembl580785                 | 3.63e-03 | 1.08e-02 |
| 17 | Olanzapine                | 0        | 0        | 98  | Itopride                        | 1.07e-05 | 5.95e-05 | 179 | Himbacine                    | 3.69e-03 | 1.09e-02 |
| 18 | Loxapine                  | 0        | 0        | 99  | Dapiprazole                     | 1.34e-05 | 6.96e-05 | 180 | Prazosin hydrochloride       | 3.73e-03 | 1.10e-02 |
| 19 | Promazine                 | 0        | 0        | 100 | Risperidone                     | 1.50e-05 | 7.95e-05 | 181 | Chembl1256682                | 3.75e-03 | 1.10e-02 |
| 20 | Propiomazine              | 0        | 0        | 101 | Pralidoxime                     | 1.69e-05 | 8.92e-05 | 182 | Methoctramine                | 3.80e-03 | 1.11e-02 |
| 21 | Carvedilol                | 0        | 0        | 102 | Periciazine                     | 1.76e-05 | 9.35e-05 | 183 | Hydrochloric acid            | 3.86e-03 | 1.12e-02 |
| 22 | Dronedarone               | 0        | 0        | 103 | Silodosin                       | 2.06e-05 | 1.08e-04 | 184 | Otenzepad                    | 3.92e-03 | 1.13e-02 |
| 23 | Epinephrine bitartrate    | 0        | 0        | 104 | Xylometazoline                  | 2.29e-05 | 1.17e-04 | 185 | Pirenzepine                  | 3.98e-03 | 1.14e-02 |

|    |                             |   |   |     |                             |          |          |     |                           |          |          |
|----|-----------------------------|---|---|-----|-----------------------------|----------|----------|-----|---------------------------|----------|----------|
| 24 | Phenylephrine               | 0 | 0 | 105 | Methadone                   | 2.50e-05 | 1.25e-04 | 186 | Methoxamine hydrochloride | 4.11e-03 | 1.17e-02 |
| 25 | Doxazosin                   | 0 | 0 | 106 | Cirazoline                  | 2.53e-05 | 1.25e-04 | 187 | Coenzyme_a                | 4.10e-03 | 1.17e-02 |
| 26 | Terazosin                   | 0 | 0 | 107 | Magnesium chloride          | 3.60e-05 | 1.78e-04 | 188 | Quinuclidinyl benzilate   | 4.16e-03 | 1.17e-02 |
| 27 | Tamsulosin                  | 0 | 0 | 108 | Huperzine b                 | 6.94e-05 | 3.39e-04 | 189 | Tripitramine              | 4.28e-03 | 1.20e-02 |
| 28 | Fenoldopam                  | 0 | 0 | 109 | Albiflorin                  | 7.18e-05 | 3.50e-04 | 190 | ChEMBL1233686             | 4.34e-03 | 1.21e-02 |
| 29 | Bethanidine                 | 0 | 0 | 110 | Sertindole                  | 7.48e-05 | 3.61e-04 | 191 | ChEMBL1628667             | 4.41e-03 | 1.22e-02 |
| 30 | Labetalol                   | 0 | 0 | 111 | ChEMBL609728                | 7.79e-05 | 3.72e-04 | 192 | Afacifenacin              | 4.47e-03 | 1.23e-02 |
| 31 | Metoprolol succinate        | 0 | 0 | 112 | Debrisoquin                 | 8.11e-05 | 3.83e-04 | 193 | Asm-024                   | 4.54e-03 | 1.25e-02 |
| 32 | Isoetharine                 | 0 | 0 | 113 | Senrebotase                 | 8.44e-05 | 3.94e-04 | 194 | Tropium chloride          | 4.60e-03 | 1.26e-02 |
| 33 | Propranolol                 | 0 | 0 | 114 | Atenolol                    | 8.78e-05 | 4.09e-04 | 195 | Homatropine methylbromide | 4.67e-03 | 1.27e-02 |
| 34 | Pirbuterol                  | 0 | 0 | 115 | Mirtazapine                 | 9.13e-05 | 4.19e-04 | 196 | Cyproheptadine            | 4.94e-03 | 1.34e-02 |
| 35 | Betaxolol                   | 0 | 0 | 116 | Betamethasone               | 9.33e-05 | 4.25e-04 | 197 | Phentolamine              | 5.87e-03 | 1.58e-02 |
| 36 | Dobutamine                  | 0 | 0 | 117 | Phenylpropanolamine         | 9.49e-05 | 4.30e-04 | 198 | (-)-cyclazosin            | 6.89e-03 | 1.84e-02 |
| 37 | Oxprenolol hydrochloride    | 0 | 0 | 118 | Alprenolol                  | 9.87e-05 | 4.45e-04 | 199 | Echothiophate iodide      | 7.45e-03 | 1.98e-02 |
| 38 | Metipranolol hydrochloride  | 0 | 0 | 119 | Pindolol                    | 1.03e-04 | 4.59e-04 | 200 | Tacrine                   | 7.54e-03 | 2.00e-02 |
| 39 | Penbutolol sulfate          | 0 | 0 | 120 | Isoprenaline                | 1.06e-04 | 4.68e-04 | 201 | Edrophonium               | 7.63e-03 | 2.01e-02 |
| 40 | Sotalol hydrochloride       | 0 | 0 | 121 | Arbutamine                  | 1.11e-04 | 4.86e-04 | 202 | Demecarium bromide        | 7.72e-03 | 2.03e-02 |
| 41 | Timolol maleate             | 0 | 0 | 122 | Nadolol                     | 1.15e-04 | 5.00e-04 | 203 | Midodrine                 | 8.01e-03 | 2.08e-02 |
| 42 | Nebivolol hydrochloride     | 0 | 0 | 123 | Fenoterol                   | 1.19e-04 | 5.13e-04 | 204 | Pyridostigmine            | 8.00e-03 | 2.08e-02 |
| 43 | Levobunolol hydrochloride   | 0 | 0 | 124 | Oxymetazoline hydrochloride | 1.23e-04 | 5.26e-04 | 205 | Rivastigmine tartrate     | 8.19e-03 | 2.12e-02 |
| 44 | Isoproterenol hydrochloride | 0 | 0 | 125 | Bevantolol                  | 1.24e-04 | 5.26e-04 | 206 | Ergotamine                | 8.48e-03 | 2.18e-02 |

|    |                           |   |   |     |                                |          |          |     |                           |          |          |
|----|---------------------------|---|---|-----|--------------------------------|----------|----------|-----|---------------------------|----------|----------|
| 45 | Esmolol hydrochloride     | 0 | 0 | 126 | Clenbuterol                    | 1.33e-04 | 5.59e-04 | 207 | Nefazodone                | 8.60e-03 | 2.19e-02 |
| 46 | Propafenone hydrochloride | 0 | 0 | 127 | Celiprolol                     | 1.38e-04 | 5.76e-04 | 208 | Methoxamine               | 8.57e-03 | 2.19e-02 |
| 47 | Desipramine               | 0 | 0 | 128 | Bopindolol                     | 1.48e-04 | 6.13e-04 | 209 | Quetiapine                | 9.22e-03 | 2.34e-02 |
| 48 | Isoproterenol             | 0 | 0 | 129 | Bupranolol                     | 1.53e-04 | 6.29e-04 | 210 | Alfuzosin                 | 9.80e-03 | 2.47e-02 |
| 49 | Carteolol                 | 0 | 0 | 130 | Metaraminol bitartrate         | 1.60e-04 | 6.47e-04 | 211 | Trazodone                 | 9.86e-03 | 2.48e-02 |
| 50 | Glycopyrrolate bromide    | 0 | 0 | 131 | Ly377604                       | 1.59e-04 | 6.47e-04 | 212 | Prazosin                  | 9.91e-03 | 2.48e-02 |
| 51 | Mivacurium                | 0 | 0 | 132 | Bucindolol                     | 1.76e-04 | 7.07e-04 | 213 | Levobunolol               | 1.01e-02 | 2.52e-02 |
| 52 | Oxyphencyclimine          | 0 | 0 | 133 | Bambuterol                     | 1.95e-04 | 7.77e-04 | 214 | Metipranolol              | 1.02e-02 | 2.53e-02 |
| 53 | Darifenacin               | 0 | 0 | 134 | Las190792                      | 3.51e-04 | 1.39e-03 | 215 | Penbutolol                | 1.03e-02 | 2.55e-02 |
| 54 | Tridihexethyl             | 0 | 0 | 135 | Suxamethonium                  | 4.65e-04 | 1.83e-03 | 216 | Oxprenolol                | 1.05e-02 | 2.56e-02 |
| 55 | Benzquinamide             | 0 | 0 | 136 | Paliperidone                   | 6.86e-04 | 2.67e-03 | 217 | Nebivolol                 | 1.06e-02 | 2.58e-02 |
| 56 | Brompheniramine           | 0 | 0 | 137 | Naphazoline hydrochloride      | 9.53e-04 | 3.69e-03 | 218 | Levobetaxolol             | 1.08e-02 | 2.62e-02 |
| 57 | Tolterodine               | 0 | 0 | 138 | Tetrahydrozoline hydrochloride | 1.11e-03 | 4.26e-03 | 219 | Sotalol                   | 1.09e-02 | 2.64e-02 |
| 58 | Pilocarpine               | 0 | 0 | 139 | Dextroamphetamine              | 1.28e-03 | 4.90e-03 | 220 | Dobutamine hydrochloride  | 1.11e-02 | 2.68e-02 |
| 59 | Pipecuronium              | 0 | 0 | 140 | Phendimetrazine                | 1.48e-03 | 5.59e-03 | 221 | Propranolol hydrochloride | 1.15e-02 | 2.75e-02 |
| 60 | Fesoterodine              | 0 | 0 | 141 | Methamphetamine                | 1.69e-03 | 6.34e-03 | 222 | Carteolol hydrochloride   | 1.16e-02 | 2.77e-02 |
| 61 | Acclidinium               | 0 | 0 | 142 | Lisdexamfetamine               | 1.92e-03 | 7.15e-03 | 223 | Timolol                   | 1.18e-02 | 2.81e-02 |
| 62 | Umeclidinium              | 0 | 0 | 143 | Darotripium bromide            | 1.99e-03 | 7.36e-03 | 224 | Papaverine                | 1.34e-02 | 3.18e-02 |
| 63 | Acetylcholine             | 0 | 0 | 144 | Methixene                      | 2.02e-03 | 7.45e-03 | 225 | Glycopyrrolate            | 1.40e-02 | 3.29e-02 |
| 64 | Bethanechol               | 0 | 0 | 145 | Terfenadine                    | 2.06e-03 | 7.53e-03 | 226 | Cyproterone acetate       | 1.42e-02 | 3.32e-02 |
| 65 | Xanomeline                | 0 | 0 | 146 | Procyclidine                   | 2.10e-03 | 7.62e-03 | 227 | Dicyclomine               | 1.42e-02 | 3.32e-02 |
| 66 | Amitriptyline             | 0 | 0 | 147 | Hyoscyamine                    | 2.14e-03 | 7.70e-03 | 228 | Hexocyclium               | 1.44e-02 | 3.34e-02 |
| 67 | Benztropine mesylate      | 0 | 0 | 148 | Ergotamine tartrate            | 2.17e-03 | 7.74e-03 | 229 | Solifenacin succinate     | 1.45e-02 | 3.36e-02 |
| 68 | Atropine                  | 0 | 0 | 149 | Anisotropine methylbromide     | 2.18e-03 | 7.74e-03 | 230 | Propantheline bromide     | 1.46e-02 | 3.37e-02 |
| 69 | Biperiden (chembl1101)    | 0 | 0 | 150 | Scopolamine                    | 2.21e-03 | 7.83e-03 | 231 | Bethanechol chloride      | 1.48e-02 | 3.39e-02 |

|    |                               |   |   |     |                             |          |          |     |                          |          |          |
|----|-------------------------------|---|---|-----|-----------------------------|----------|----------|-----|--------------------------|----------|----------|
| 70 | Ipratropium                   | 0 | 0 | 151 | Tropicamide                 | 2.25e-03 | 7.91e-03 | 232 | Fesoterodine fumarate    | 1.49e-02 | 3.41e-02 |
| 71 | Oxybutynin                    | 0 | 0 | 152 | Diphenidol                  | 2.34e-03 | 8.15e-03 | 233 | Amphetamine              | 1.50e-02 | 3.41e-02 |
| 72 | Propantheline                 | 0 | 0 | 153 | Chlorprothixene             | 2.38e-03 | 8.23e-03 | 234 | Darifenacin hydrobromide | 1.51e-02 | 3.41e-02 |
| 73 | Solifenacin                   | 0 | 0 | 154 | Arecaidine propargyl ester  | 2.42e-03 | 8.33e-03 | 235 | Atropine sulfate         | 1.52e-02 | 3.43e-02 |
| 74 | Clidinium                     | 0 | 0 | 155 | Arecoline                   | 2.46e-03 | 8.42e-03 | 236 | Oxybutynin chloride      | 1.53e-02 | 3.44e-02 |
| 75 | Tiotropium<br>(chembl1900528) | 0 | 0 | 156 | Furtrethonium               | 2.50e-03 | 8.51e-03 | 237 | Tolterodine tartrate     | 1.55e-02 | 3.46e-02 |
| 76 | Norepinephrine                | 0 | 0 | 157 | 5-methylfurmethiodide       | 2.55e-03 | 8.60e-03 | 238 | Isoproterenol sulfate    | 1.83e-02 | 4.07e-02 |
| 77 | Cabergoline                   | 0 | 0 | 158 | Chembl99521                 | 2.59e-03 | 8.69e-03 | 239 | Mephentermine            | 1.85e-02 | 4.10e-02 |
| 78 | Clozapine                     | 0 | 0 | 159 | Eribaxaban                  | 2.63e-03 | 8.78e-03 | 240 | Metoprolol               | 1.86e-02 | 4.10e-02 |
| 79 | Levomepromazine               | 0 | 0 | 160 | Oxotremorine                | 2.68e-03 | 8.88e-03 | 241 | Vortioxetine             | 1.94e-02 | 4.27e-02 |
| 80 | Droxidopa                     | 0 | 0 | 161 | Phenylephrine hydrochloride | 2.73e-03 | 8.92e-03 | 242 | Acebutolol               | 2.23e-02 | 4.89e-02 |
| 81 | Noradrenaline                 | 0 | 0 | 162 | Chembl130715                | 2.73e-03 | 8.92e-03 |     |                          |          |          |

Supplementary Table 7. KEGG glaucoma drug targeted 13 genes, 166 chemicals are enriched in clue database for these genes.

| order | Durg                                      | FDR<0.05 | order | Durg         | FDR<0.05 | order | Durg               | FDR<0.05 |
|-------|-------------------------------------------|----------|-------|--------------|----------|-------|--------------------|----------|
| 1     | diphemanil                                | 4.31E-05 | 56    | protopine    | 4.95E-05 | 113   | acetylcholine      | 6.55E-05 |
| 2     | ethoprop                                  | 4.31E-05 | 57    | sotalol      | 4.95E-05 | 114   | amiodarone         | 6.99E-05 |
| 3     | velnacrine                                | 4.31E-05 | 58    | BRL-37344    | 4.95E-05 | 115   | coumarin           | 6.99E-05 |
| 4     | isoxsuprine                               | 4.31E-05 | 59    | CGP-12177    | 4.95E-05 | 116   | paroxetine         | 6.99E-05 |
| 5     | propentofylline                           | 4.31E-05 | 60    | dobutamine   | 4.95E-05 | 117   | terfenadine        | 6.99E-05 |
| 6     | practolol                                 | 4.31E-05 | 61    | fluprostenol | 4.95E-05 | 118   | phenoxybenzamine   | 6.99E-05 |
| 7     | zamifenacin                               | 4.31E-05 | 62    | SR-59230A    | 4.95E-05 | 119   | tubocurarine       | 6.99E-05 |
| 8     | harpagoside                               | 4.31E-05 | 63    | itopride     | 4.95E-05 | 120   | niacin             | 6.99E-05 |
| 9     | J-104129                                  | 4.31E-05 | 64    | withaferin-a | 4.95E-05 | 121   | hydroflumethiazide | 6.99E-05 |
| 10    | mep tazinol                               | 4.31E-05 | 65    | profenamine  | 5.15E-05 | 122   | mephentermine      | 7.49E-05 |
| 11    | buphenine                                 | 4.31E-05 | 66    | vinburnine   | 5.15E-05 | 123   | minaprine          | 7.49E-05 |
| 12    | procaterol                                | 4.31E-05 | 67    | mebeverine   | 5.15E-05 | 124   | brinzolamide       | 7.49E-05 |
| 13    | ritodrine                                 | 4.31E-05 | 68    | oxotremorine | 5.15E-05 | 125   | carbacyclin        | 7.49E-05 |
| 14    | salmeterol                                | 4.31E-05 | 69    | resorcinol   | 5.15E-05 | 126   | dosulepin          | 7.49E-05 |
| 15    | 10H-phenothiazin-10-yl)(p-tolyl)methanone | 4.31E-05 | 70    | tropicamide  | 5.15E-05 | 127   | U-46619            | 7.49E-05 |
| 16    | BRD-K66896231                             | 4.31E-05 | 71    | arecaidine   | 5.15E-05 | 128   | pentoxifylline     | 8.19E-05 |
| 17    | huperzine-a                               | 4.31E-05 | 73    | diphenidol   | 5.15E-05 | 129   | tramadol           | 8.19E-05 |
| 18    | esmolol                                   | 4.31E-05 | 74    | hyoscyamine  | 5.15E-05 | 130   | strychnine         | 8.81E-05 |
| 19    | latanoprost                               | 4.31E-05 | 75    | vincamine    | 5.15E-05 | 131   | catechin           | 8.81E-05 |
| 20    | orciprenaline                             | 4.31E-05 | 76    | pancuronium  | 5.15E-05 | 132   | epinephrine        | 8.81E-05 |
| 21    | terbutaline                               | 4.31E-05 | 77    | trimebutine  | 5.15E-05 | 133   | chlorprothixene    | 9.39E-05 |
| 22    | bisoprolol                                | 4.31E-05 | 78    | bimatoprost  | 5.15E-05 | 134   | dinoprostone       | 9.39E-05 |
| 23    | clebopride                                | 4.31E-05 | 79    | procyclidine | 5.15E-05 | 135   | cyproheptadine     | 9.39E-05 |
| 24    | desoxypeganine                            | 4.31E-05 | 80    | oxybutynin   | 5.15E-05 | 136   | iloprost           | 1.01E-04 |

|    |                        |          |     |                                      |          |     |                     |          |
|----|------------------------|----------|-----|--------------------------------------|----------|-----|---------------------|----------|
| 25 | donepezil              | 4.31E-05 | 81  | propantheline                        | 5.15E-05 | 137 | dihydroergocristine | 1.07E-04 |
| 26 | etilefrine             | 4.31E-05 | 82  | bethanechol                          | 5.15E-05 | 138 | norepinephrine      | 1.07E-04 |
| 27 | methoxsalen            | 4.31E-05 | 83  | brucine                              | 5.56E-05 | 139 | promazine           | 1.14E-04 |
| 28 | oxprenolol             | 4.31E-05 | 84  | dipivefrine                          | 5.56E-05 | 140 | nicardipine         | 1.20E-04 |
| 29 | apoptosis-activator-II | 4.31E-05 | 85  | ephedrine                            | 5.56E-05 | 141 | cinnarizine         | 1.20E-04 |
| 30 | betaxolol              | 4.31E-05 | 86  | ipratropium                          | 5.56E-05 | 142 | maprotiline         | 1.27E-04 |
| 31 | CGP-20712              | 4.31E-05 | 87  | labetalol                            | 5.56E-05 | 143 | galantamine         | 1.33E-04 |
| 32 | carteolol              | 4.31E-05 | 88  | metixene                             | 5.56E-05 | 144 | levomepromazine     | 1.39E-04 |
| 33 | DAU-5884               | 4.31E-05 | 89  | quinethazone                         | 5.56E-05 | 145 | carvedilol          | 1.46E-04 |
| 34 | flavoxate              | 4.31E-05 | 90  | solifenacin                          | 5.56E-05 | 146 | desipramine         | 1.50E-04 |
| 35 | formoterol             | 4.31E-05 | 91  | diclofenamide                        | 5.56E-05 | 147 | cabergoline         | 1.50E-04 |
| 36 | ICI-89406              | 4.31E-05 | 92  | pirenzepine                          | 5.56E-05 | 148 | curcumin            | 1.50E-04 |
| 37 | imperatorin            | 4.31E-05 | 93  | glycopyrrolate                       | 5.56E-05 | 149 | pseudoephedrine     | 1.56E-04 |
| 38 | isamoltan              | 4.31E-05 | 94  | pilocarpine                          | 5.56E-05 | 150 | mirtazapine         | 1.62E-04 |
| 39 | metoprolol             | 4.31E-05 | 95  | tolterodine                          | 5.56E-05 | 151 | trimipramine        | 1.68E-04 |
| 40 | timolol                | 4.31E-05 | 96  | bendroflumethiazide                  | 5.92E-05 | 152 | doxepin             | 1.72E-04 |
| 41 | methylene-blue         | 4.31E-05 | 97  | benzthiazide                         | 5.92E-05 | 153 | imipramine          | 1.72E-04 |
| 42 | tacrine                | 4.31E-05 | 98  | brompheniramine                      | 5.92E-05 | 154 | aripiprazole        | 1.72E-04 |
| 43 | physostigmine          | 4.31E-05 | 99  | pindolol                             | 5.92E-05 | 155 | ziprasidone         | 1.77E-04 |
| 44 | salbutamol             | 4.31E-05 | 100 | triflupromazine                      | 5.92E-05 | 156 | nortriptyline       | 1.82E-04 |
| 45 | acebutolol             | 4.31E-05 | 101 | biperiden                            | 5.92E-05 | 157 | topiramate          | 1.82E-04 |
| 46 | atenolol               | 4.31E-05 | 102 | diazoxide                            | 5.92E-05 | 158 | chlorpromazine      | 1.86E-04 |
| 47 | edrophonium            | 4.31E-05 | 103 | scopolamine                          | 5.92E-05 | 159 | quetiapine          | 1.86E-04 |
| 48 | mestinon               | 4.31E-05 | 105 | mafenide                             | 5.92E-05 | 160 | zonisamide          | 2.05E-04 |
| 49 | pyridine-2-aldoxime    | 4.31E-05 | 106 | propranolol                          | 5.92E-05 | 161 | loxapine            | 2.09E-04 |
| 50 | alprenolol             | 4.95E-05 | 107 | 4-(2-Amino-ethyl)-benzenesulfonamide | 5.92E-05 | 162 | clozapine           | 2.09E-04 |



---

|    |               |          |     |               |          |     |               |          |
|----|---------------|----------|-----|---------------|----------|-----|---------------|----------|
| 51 | dicycloverine | 4.95E-05 | 108 | disopyramide  | 6.55E-05 | 163 | staurosporine | 2.14E-04 |
| 52 | fenoterol     | 4.95E-05 | 109 | herniarin     | 6.55E-05 | 164 | amitriptyline | 2.26E-04 |
| 53 | L-755507      | 4.95E-05 | 110 | propafenone   | 6.55E-05 | 165 | amoxapine     | 2.82E-04 |
| 54 | metolazone    | 4.95E-05 | 111 | prostaglandin | 6.55E-05 | 166 | olanzapine    | 3.18E-04 |
| 55 | nadolol       | 4.95E-05 | 112 | methazolamide | 6.55E-05 |     |               |          |

---
